# Supplementary material for: Individual Differences in the Vocal Communication of Malayan Tapirs (Tapirus indicus) Considering Familiarity and Relatedness
Source: Animals (Basel). 2021 Apr 5;11(4):1026. doi: 10.3390/ani11041026 (PMC8065771; doi:10.3390/ani11041026)
Supplement: Supplementary file 1 [file animals-11-01026-s001.xlsx]

## Sheet: Tabelle1
Call-ID	Zoo	Tapir	Sex	Duration	F0_start	F0_end	F0_max	F0_min	F0_mean	lm_mean	lm_max	F0_loc	tr_fak	tr_mean	tr_max	Pf_start	Pf_end	Pf_max	Pf_min	Pf_mean	Pf_maxamp	Pf_minamp	Pf_maxloc	Pf_minloc	Pf_maxdif	noise_mean	noise_max
D_783_1803_19.lma	Dortmund	Jinak	Male	275.4	2630	2677	2818	986	1891	132	1174	0.05	-0.33	279	1565	751	423	15734	376	2748	2677	15734	0.17	0.02	12211	0.81	0.88
D_783_1803_23.lma	Dortmund	Jinak	Male	253.8	2489	2348	2865	1080	2205	70	834	0.01	-0.3	199	1171	3663	470	5730	376	2472	2160	3663	0.48	0	3100	0.82	0.87
D_783_1803_28.lma	Dortmund	Jinak	Male	286.2	1879	1362	2771	986	1728	84	1104	0.02	-0.3	287	1470	1879	892	11977	423	1910	1221	470	0.58	0.97	11507	0.83	0.87
D_783_1804_18.lma	Dortmund	Jinak	Male	394.2	986	1221	2677	986	1887	100	751	0.21	-0.21	292	1626	986	892	21558	376	2216	2536	2160	0.3	0.06	20290	0.76	0.86
D_783_1804_24.lma	Dortmund	Jinak	Male	310.5	1456	1503	2395	892	1623	45	595	0.03	-0.27	158	907	1456	423	6763	423	1731	2160	6763	0.25	0.98	6341	0.8	0.86
D_783_1803_17.lma	Dortmund	Jinak	Male	216	1691	1221	2677	1127	1994	100	928	0.11	-0.15	337	960	1691	751	20337	376	2254	3804	2395	0.68	0.99	19726	0.84	0.87
D_783_1803_2.lma	Dortmund	Jinak	Male	197.1	3710	1315	3710	1315	2296	82	1259	0	-0.29	277	1221	11601	1315	11601	1315	2656	2677	11601	0.35	0.01	9346	0.79	0.89
D_783_1803_27.lma	Dortmund	Jinak	Male	307.8	2489	2771	3476	1268	2067	105	1315	0.89	-0.22	301	1864	2489	705	15452	376	2190	1503	2207	0.64	0.96	15076	0.84	0.87
D_783_1830_9a.lma	Dortmund	Jinak	Male	113.4	2395	3710	3710	1503	2191	105	634	1	0.43	279	1101	2395	16110	16110	376	2550	2254	16110	0.34	1	15217	0.8	0.87
D_783_1830_9b.lma	Dortmund	Jinak	Male	97.2	2114	1550	2583	1456	2369	111	595	0.49	0.24	182	1019	1033	470	20149	470	3228	2583	1080	0.51	0.11	19068	0.76	0.88
D_783_1946_1.lma	Dortmund	Jinak	Male	108	2442	1550	2442	1550	1849	25	78	0	-0.37	71	251	2442	1550	2442	1550	1849	1785	1879	0.56	0.33	188	0.17	0.33
D_783_1947_1.lma	Dortmund	Jinak	Male	81	2724	1879	2724	1832	2367	49	141	0	-0.7	100	279	2724	1879	2724	1832	2367	1879	2724	0.9	0	329	0.37	0.65
D_783_1949_1.lma	Dortmund	Jinak	Male	70.2	2630	1644	2630	1644	1958	38	141	0	-0.67	89	278	2630	1644	2630	1644	1958	1785	2630	0.68	0	235	0.28	0.5
D_783_1950_1.lma	Dortmund	Jinak	Male	81	2630	1785	2677	1785	2195	46	160	0.03	-0.69	77	178	2630	1785	2677	1785	2195	2020	2583	0.76	0.17	329	0.3	0.52
D_783_1951_1.lma	Dortmund	Jinak	Male	32.4	2114	1738	2114	1738	1863	43	129	0	-0.57	60	129	2114	1738	2114	1738	1863	1785	2114	0.73	0	235	0.21	0.36
D_783_1952_1.lma	Dortmund	Jinak	Male	24.3	2583	2114	2583	2114	2254	2254	2254	0	-1.08	46	125	2583	2114	2583	2114	2254	2114	2583	1	0	235	0.39	0.67
D_783_1954_1.lma	Dortmund	Jinak	Male	32.4	2442	1879	2442	1879	2145	40	125	0	-0.91	36	83	2442	1879	2442	1879	2145	1926	2442	0.91	0	188	0.31	0.57
D_783_1955_1.lma	Dortmund	Jinak	Male	24.3	2348	1832	2348	1832	2114	2114	2114	0	-1.43	43	114	2348	1832	2348	1832	2114	1832	2348	1	0.12	235	0.19	0.3
D_783_1956_1.lma	Dortmund	Jinak	Male	24.3	2254	1785	2254	1785	1967	1967	1967	0	-1.43	49	87	2254	1785	2254	1785	1967	1785	2254	1	0	188	0.16	0.3
D_783_1958_1.lma	Dortmund	Jinak	Male	24.3	2254	1785	2254	1785	1962	1962	1962	0	-1.33	36	83	2254	1785	2254	1785	1962	1785	2254	1	0	141	0.18	0.33
D_783_1959_1.lma	Dortmund	Jinak	Male	24.3	2395	1785	2395	1785	1973	1973	1973	0	-1.65	108	190	2395	1785	2395	1785	1973	1785	2395	1	0.12	423	0.19	0.38
D_783_1962_1.lma	Dortmund	Jinak	Male	51.3	2395	1832	2489	1832	2257	88	310	0.17	-0.7	113	261	2395	1832	2489	1832	2257	1832	2442	1	0.06	517	0.26	0.46
D_783_1963_1.lma	Dortmund	Jinak	Male	13.5	2114	2114	2207	2114	2170	2170	2170	0.25	0	45	56	2114	2114	2207	2114	2170	2207	2207	0.5	0.75	94	0.19	0.34
D_783_1829_15.lma	Dortmund	Jinak	Male	113.4	1503	2912	2912	1503	2818	44	599	0.24	0.26	152	1081	1503	2912	11272	986	3020	2912	2912	0.49	0.95	8360	0.7	0.87
D_783_1829_17.lma	Dortmund	Jinak	Male	110.7	3569	2912	3569	1503	2817	123	1080	0	-0.07	173	1273	1221	2912	5730	986	2769	2865	986	0.3	0.02	4227	0.72	0.87
D_783_1829_4.lma	Dortmund	Jinak	Male	89.1	2207	2536	2536	2020	2297	70	357	0.28	0.03	195	283	2207	1127	14748	1127	2538	2536	14748	0.38	0.88	13620	0.79	0.87
D_783_1829_7.lma	Dortmund	Jinak	Male	99.9	2442	2771	2818	1362	2516	95	928	0.19	-0.44	221	806	2442	798	7703	798	2923	2818	2489	0.36	0.92	5166	0.81	0.88
D_783_1829_9.lma	Dortmund	Jinak	Male	126.9	2254	2771	3710	1550	2760	194	1362	0.04	-0.14	219	1134	2254	7984	7984	376	2252	2818	2818	0.3	0.96	5166	0.76	0.87
D_783_1802_8.lma	Dortmund	Jinak	Male	974.7	2818	1926	3053	1080	1895	173	1277	0.15	-0.03	497	1179	423	986	14607	423	1823	2771	1503	0.27	0.96	13949	0.8	0.86
D_783_1802_9.lma	Dortmund	Jinak	Male	558.9	3100	1362	3100	1080	2055	59	620	0	-0.14	226	942	3100	751	5824	423	2395	2160	2677	0.64	0	3710	0.75	0.86
D_783_1803_21.lma	Dortmund	Jinak	Male	596.7	2114	2207	2818	1080	2046	58	751	0.05	-0.05	394	1207	17706	751	17706	376	2590	2160	17706	0.73	0	12117	0.79	0.87
D_783_1803_25.lma	Dortmund	Jinak	Male	720.9	1926	2771	3147	1080	1982	99	977	0.21	-0.1	332	1427	13996	423	21746	376	2750	2160	21746	0.6	0.29	21323	0.82	0.87
D_783_1804_16.lma	Dortmund	Jinak	Male	658.8	1644	1832	3194	1127	2082	140	1353	0.53	-0.04	404	1188	15781	892	20102	423	3796	2160	16204	0.78	0.04	19162	0.81	0.87
D_783_1804_20.lma	Dortmund	Jinak	Male	656.1	3241	2536	3382	1174	2079	93	1174	0.96	-0.06	402	1619	3241	5918	18223	376	2672	2114	892	0.66	0.02	17706	0.78	0.88
L_880_1432_1.lma	Leipzig	Copaish	Male	108	2583	2536	2724	1221	2510	92	877	0.23	-0.39	186	972	2583	1080	7656	1080	3574	5260	2583	0.59	0	5072	0.37	0.52
L_880_1432_2.lma	Leipzig	Copaish	Male	70.2	2489	1268	2630	1268	2379	72	526	0.44	-0.77	324	766	2489	939	5213	939	2984	2630	2489	0.64	0	3476	0.43	0.53
L_880_1441_1.lma	Leipzig	Copaish	Male	62.1	1362	1268	3616	1268	2177	285	1531	0.82	-0.7	347	1669	751	658	6200	658	4439	4932	751	0.45	0	4321	0.34	0.46
L_880_1460_1.lma	Leipzig	Copaish	Male	140.4	2114	2301	2536	1973	2314	54	272	0.35	0.02	153	353	2114	4744	7562	705	3644	4838	2301	0.27	0.96	3710	0.4	0.49
L_880_1468_1.lma	Leipzig	Copaish	Male	89.1	1409	2114	2442	1409	2294	53	611	0.41	-0.06	118	932	658	2114	4885	658	2494	2160	658	0.94	0	2489	0.4	0.5
L_880_1370_5.lma	Leipzig	Copaish	Male	51.3	2583	2254	2724	2254	2541	39	103	0.28	-0.45	67	153	5166	2254	5354	2254	2956	2254	5166	1	0	2724	0.25	0.39
L_880_1371_2.lma	Leipzig	Copaish	Male	67.5	2207	2067	2536	2067	2309	27	75	0.42	-0.16	113	243	2207	2067	2536	376	2236	2067	2348	0.96	0.12	1973	0.31	0.5
L_880_1373_1.lma	Leipzig	Copaish	Male	137.7	2536	2020	2583	2020	2302	22	75	0.22	-0.23	35	141	2536	2020	5119	376	2416	2020	2536	1	0	2630	0.27	0.39
L_880_1414_1.lma	Leipzig	Copaish	Male	62.1	2348	2254	2677	2254	2455	63	254	0.09	-0.24	86	265	5119	2254	5448	2254	4558	2254	2677	1	0.09	2771	0.29	0.4
L_880_1421_1.lma	Leipzig	Copaish	Male	113.4	2677	2489	2677	2301	2421	19	63	0	-0.06	57	200	2677	2489	4744	2348	2697	2395	2489	0.63	1	2348	0.14	0.23
L_880_1438_1.lma	Leipzig	Copaish	Male	126.9	2536	2348	2677	2254	2425	39	122	0.13	-0.03	113	229	2536	2348	7750	2254	3140	2254	2348	0.37	1	5401	0.13	0.22
L_880_1452_1.lma	Leipzig	Copaish	Male	148.5	2254	2583	2818	2254	2488	26	122	0.61	0.05	108	316	2254	2583	5025	2254	3109	2395	4744	0.33	0.94	2583	0.19	0.34
L_880_1473_1.lma	Leipzig	Copaish	Male	162	3241	2912	3429	2865	3058	19	94	0.07	-0.19	93	184	3241	2912	3429	2865	3058	2959	3241	0.41	0	188	0.27	0.5
L_880_1419_2.lma	Leipzig	Copaish	Male	72.9	2114	2301	2395	1832	2218	59	282	0.42	0.07	93	411	2114	2301	5260	1879	3168	2301	2348	0.5	0.96	3382	0.33	0.51
L_880_1458_1.lma	Leipzig	Copaish	Male	83.7	2301	1174	3006	1127	2276	174	939	0.83	-0.13	356	1061	4603	4603	4838	1127	3742	4791	4603	0.47	1	3476	0.36	0.47
L_880_1388_1.lma	Leipzig	Copaish	Male	113.4	2442	2160	2442	2160	2275	15	75	0	-0.11	51	147	611	2160	4838	611	2289	2348	4838	0.2	0.02	4227	0.31	0.41
B_919_1707_1.lma	Beauval	Tioman	Male	162	3147	1409	3147	1409	2789	66	939	0	-0.23	103	1062	3147	1362	8971	1362	4835	2865	2865	0.44	0.98	5918	0.22	0.42
B_919_1712_12.lma	Beauval	Tioman	Male	132.3	2630	1879	3194	1879	2950	68	470	0.04	-0.15	122	904	2630	1174	9159	1174	5264	2818	1174	0.02	1	7186	0.32	0.63
B_919_1714_18.lma	Beauval	Tioman	Male	170.1	3288	1550	3335	1503	2909	133	1277	0.02	-0.28	235	1639	3288	751	9252	705	4995	6481	3006	0.06	0.98	5918	0.23	0.36
B_919_1714_22.lma	Beauval	Tioman	Male	126.9	2489	3194	3429	1597	3051	213	1240	0.07	-0.2	262	1255	1362	1315	6763	845	4860	6247	3053	0.28	0.89	5636	0.24	0.38
B_919_1714_5.lma	Beauval	Tioman	Male	108	1644	2114	3147	1644	2932	80	751	0.08	0.03	135	1258	1644	2114	6998	1174	4106	6012	2114	0.13	1	4039	0.3	0.57
B_919_1725_1.lma	Beauval	Tioman	Male	170.1	2114	2818	4509	1597	2969	110	1386	0.98	0.14	301	1336	1268	658	9299	658	4493	6106	1738	0.68	0.08	6247	0.32	0.5
B_919_1726_1.lma	Beauval	Tioman	Male	194.4	3523	3194	3523	1644	3168	59	939	0	-0.1	112	1384	7045	3194	7045	798	3746	3194	1268	0.2	0.92	5213	0.26	0.42
B_919_1743_12.lma	Beauval	Tioman	Male	94.5	2020	3006	3147	1644	2735	176	789	0.65	-0.13	409	1014	1080	1033	6059	658	3564	5918	892	0.59	0.97	5307	0.55	0.85
B_919_1714_13.lma	Beauval	Tioman	Male	207.9	1550	1550	3241	1550	2833	116	1108	0.08	-0.08	323	1420	1550	1362	9065	658	4134	3006	1174	0.37	0.96	6106	0.34	0.46
B_919_1725_10.lma	Beauval	Tioman	Male	159.3	1738	3053	3241	1597	2934	107	836	0.05	-0.08	205	1299	1738	5871	6200	1315	3909	3053	5918	0.41	0.98	4556	0.34	0.5
B_919_1725_7.lma	Beauval	Tioman	Male	151.2	3523	3053	3523	3006	3155	19	150	0	-0.12	85	301	845	3053	9581	658	4514	3100	3523	0.56	0.02	6341	0.39	0.55
B_919_1726_6.lma	Beauval	Tioman	Male	183.6	4133	3053	4133	1879	3044	85	1022	0	-0.09	124	1119	1315	939	6294	845	3207	3053	2254	0.3	0.01	3100	0.33	0.44
B_919_1726_7.lma	Beauval	Tioman	Male	245.7	1738	3006	3194	1597	2858	157	1174	0.71	0	257	1264	1033	1127	6387	705	3362	5965	1080	0.52	0.02	5260	0.3	0.43
L_942_1370_1.lma	Leipzig	Laila	Female	129.6	1785	2114	2724	1409	2463	46	639	0.23	-0.13	206	1181	470	2114	5401	470	2656	2207	2630	0.83	0.06	2724	0.35	0.48
L_942_1410_1.lma	Leipzig	Laila	Female	16.2	2724	2724	2724	2724	2724	2724	2724	0	0	0	0	2724	2724	2724	2724	2724	2724	2724	1	0	0	0.28	0.43
L_942_1411_1.lma	Leipzig	Laila	Female	81	2771	2724	2959	2724	2834	17	70	0.28	-0.16	52	173	2771	2724	5965	2724	2935	2724	2912	0.97	0.07	3100	0.36	0.47
L_942_1429_1.lma	Leipzig	Laila	Female	135	1362	2865	3100	1362	2841	82	1024	0.33	0.19	199	1300	845	2865	6012	845	4206	5730	845	0.73	0	4227	0.26	0.37
L_942_1458_2.lma	Leipzig	Laila	Female	126.9	2020	3147	3382	2020	3138	40	407	0.43	0.22	148	884	845	3147	6716	611	3362	3335	611	0.59	0.02	5213	0.39	0.49
L_942_1478_1.lma	Leipzig	Laila	Female	132.3	2630	2912	3053	2630	2933	33	94	0.44	0.08	65	208	2630	6106	6153	2630	3916	2959	5448	0.25	0.1	3194	0.23	0.39
L_942_1501_1.lma	Leipzig	Laila	Female	56.7	3006	3053	3100	3006	3066	17	47	0.2	0.04	28	47	3006	3053	3100	3006	3066	3053	3006	0.5	0	94	0.31	0.58
L_942_1367_1.lma	Leipzig	Laila	Female	143.1	2724	2724	2771	2536	2654	16	56	0.19	-0.05	42	135	2724	7609	7609	2536	2931	2724	7609	0.13	1	5025	0.11	0.23
L_942_1369_1.lma	Leipzig	Laila	Female	183.6	2818	2677	3100	2489	2799	30	211	0.22	-0.12	75	348	5777	2677	5918	2489	3253	2912	5777	0.31	0	2865	0.3	0.45
L_942_1370_4.lma	Leipzig	Laila	Female	110.7	3053	2630	3241	2630	2954	34	141	0.52	-0.29	107	300	6059	2630	6434	2630	3337	2677	6059	0.95	0.05	3382	0.34	0.45
L_942_1370_6.lma	Leipzig	Laila	Female	75.6	3100	2865	3288	2818	3068	23	66	0.3	-0.3	66	160	3100	2865	6294	2818	3630	3006	3194	0.59	0.22	3194	0.26	0.41
L_942_1371_1.lma	Leipzig	Laila	Female	226.8	2912	2207	3100	2160	2589	23	141	0.13	-0.28	113	286	2912	2207	6294	2160	2762	2583	3053	0.45	0.12	3382	0.22	0.52
L_942_1374_1.lma	Leipzig	Laila	Female	116.1	2818	2489	3053	2489	2804	23	141	0.05	-0.26	53	243	5918	2489	5918	2489	2944	2677	5918	0.86	0	2865	0.29	0.43
L_942_1376_1.lma	Leipzig	Laila	Female	194.4	3194	2630	3194	2254	2680	41	250	0	-0.24	106	356	3194	2630	4556	2254	2765	2536	3194	0.54	0	2301	0.16	0.28
L_942_1377_1.lma	Leipzig	Laila	Female	132.3	2912	2442	3006	2442	2676	18	75	0.04	-0.23	34	150	2912	2442	3006	2442	2676	2818	2959	0.25	0.08	141	0.16	0.31
L_942_1378_1.lma	Leipzig	Laila	Female	213.3	3147	2207	4415	2114	2608	131	1785	0.83	-0.18	196	2060	3147	2207	5354	2114	2797	2818	3147	0.17	0	2677	0.11	0.21
L_942_1379_1.lma	Leipzig	Laila	Female	189	3147	2583	3147	2536	2743	34	188	0	-0.16	81	170	3147	2583	3147	2536	2743	2630	3147	0.54	0.03	235	0.12	0.22
L_942_1380_1.lma	Leipzig	Laila	Female	251.1	3288	2348	3288	2301	2621	34	366	0	-0.19	115	540	3288	2348	6575	2348	2926	2630	2489	0.32	0.96	3382	0.12	0.23
L_942_1381_1.lma	Leipzig	Laila	Female	226.8	3006	2160	3147	2160	2472	49	319	0.04	-0.21	81	340	3006	2160	3147	2160	2472	2254	2254	0.58	0.94	423	0.11	0.18
L_942_1382_1.lma	Leipzig	Laila	Female	180.9	3288	2348	3288	2301	2648	15	94	0	-0.29	65	242	3288	4697	5636	2301	2986	2677	2348	0.38	0.85	2818	0.1	0.17
L_942_1394_1.lma	Leipzig	Laila	Female	229.5	2536	2771	3100	2536	2847	26	235	0.1	-0.07	69	451	2536	2771	5401	2536	2969	2818	2536	0.33	0	2677	0.29	0.42
L_942_1396_1.lma	Leipzig	Laila	Female	145.8	3006	2536	3006	2442	2629	19	75	0	-0.2	60	156	3006	2536	5495	2442	3295	2583	2536	0.45	1	2771	0.12	0.2
L_942_1399_1.lma	Leipzig	Laila	Female	189	3194	2677	3194	2677	2845	24	113	0	-0.11	70	242	3194	2677	5542	2677	2958	3006	5401	0.12	0.86	2818	0.13	0.22
L_942_1407_1.lma	Leipzig	Laila	Female	137.7	2912	2677	3006	2489	2644	19	113	0.12	-0.19	60	259	2912	2677	3006	2489	2644	2583	2865	0.44	0.02	188	0.22	0.4
L_942_1413_1.lma	Leipzig	Laila	Female	156.6	2912	2207	3100	2207	2599	22	150	0.11	-0.28	36	208	2912	2207	3100	1127	2568	2583	1127	0.54	0.07	1785	0.31	0.46
L_942_1415_1.lma	Leipzig	Laila	Female	110.7	2395	2160	2395	2067	2204	12	47	0	-0.16	43	129	2395	2160	2395	2067	2204	2301	2160	0.25	0.95	47	0.09	0.16
L_942_1416_1.lma	Leipzig	Laila	Female	186.3	3194	2630	3288	2630	2787	18	141	0.03	-0.18	92	249	6575	2630	6575	2630	2884	3006	2630	0.19	1	3241	0.13	0.27
L_942_1417_1.lma	Leipzig	Laila	Female	180.9	3053	2630	3288	2583	2821	31	160	0.06	-0.2	112	398	3053	2630	6294	2583	2983	3100	6294	0.2	0.03	3241	0.12	0.23
L_942_1418_1.lma	Leipzig	Laila	Female	237.6	3147	2254	3147	2207	2535	27	225	0	-0.22	83	420	6247	2254	6247	2207	2594	2771	3053	0.24	0.05	3147	0.14	0.25
L_942_1419_1.lma	Leipzig	Laila	Female	137.7	3288	2912	3288	2818	2931	19	66	0	-0.11	70	226	3288	2912	5777	2818	3153	2865	2912	0.34	0.96	2912	0.12	0.2
L_942_1420_1.lma	Leipzig	Laila	Female	189	2959	2442	3288	2442	2802	28	160	0.22	-0.24	113	285	2959	2442	6434	2442	2852	2865	6434	0.36	0.07	3429	0.27	0.42
L_942_1422_1.lma	Leipzig	Laila	Female	205.2	1738	2912	3382	1503	2917	53	775	0.21	-0.07	148	1529	5730	2912	6622	2724	3426	3006	5824	0.36	0.04	3382	0.32	0.46
L_942_1434_1.lma	Leipzig	Laila	Female	180.9	3382	2865	3382	2771	2953	25	132	0	-0.18	101	207	3382	2865	3382	2771	2953	2912	2865	0.35	0.98	282	0.2	0.44
L_942_1454_1.lma	Leipzig	Laila	Female	218.7	3194	2912	3194	2912	2980	23	122	0	-0.05	40	129	3194	2912	3194	2912	2980	3006	2912	0.24	0.89	188	0.2	0.38
L_942_1455_1.lma	Leipzig	Laila	Female	180.9	3147	2959	3288	2865	3007	21	85	0.05	-0.09	52	156	3147	2959	3288	2865	3007	2959	3147	0.35	0	188	0.33	0.54
L_942_1457_1.lma	Leipzig	Laila	Female	245.7	2912	3006	3335	2771	2938	49	282	0.13	-0.09	96	403	5777	3006	6387	2771	3252	3006	5777	0.24	0	3194	0.36	0.49
L_942_1459_1.lma	Leipzig	Laila	Female	194.4	2865	2489	3147	2395	2680	16	63	0.08	-0.19	67	218	5871	2489	6247	2442	2944	2771	5871	0.28	0	3288	0.13	0.23
L_942_1460_1.lma	Leipzig	Laila	Female	143.1	3382	2959	3382	2724	2956	35	122	0	-0.21	97	258	3382	2959	3382	2724	2956	2912	3382	0.38	0	235	0.18	0.29
L_942_1461_1.lma	Leipzig	Laila	Female	194.4	2865	2865	3382	2724	2977	34	141	0.14	-0.14	96	347	5918	2865	6622	2771	3801	3006	2771	0.38	0.96	3429	0.22	0.38
L_942_1463_1.lma	Leipzig	Laila	Female	167.4	3100	2865	3288	2818	2963	23	117	0.03	-0.12	66	195	6528	2865	6622	2818	3560	2865	3100	0.54	0.21	3382	0.14	0.29
L_942_1464_1.lma	Leipzig	Laila	Female	180.9	3382	3006	3523	2959	3128	23	85	0.09	-0.15	76	215	3382	3006	3523	2959	3128	3006	3382	0.61	0	141	0.25	0.4
L_942_1466_1.lma	Leipzig	Laila	Female	170.1	3288	2865	3288	2818	2969	33	225	0	-0.14	91	265	3288	2865	5918	2818	3111	2865	5683	0.56	0.89	3053	0.24	0.42
L_942_1468_2.lma	Leipzig	Laila	Female	170.1	3241	2959	3335	2818	2972	23	244	0.03	-0.14	110	237	3241	2959	5871	2818	3153	2865	2959	0.66	1	2912	0.13	0.27
L_942_1469_1.lma	Leipzig	Laila	Female	175.5	3288	2818	3429	2677	2926	19	75	0.06	-0.21	105	241	3288	2818	6763	2677	3278	2865	6763	0.41	0.02	3476	0.11	0.2
L_942_1470_1.lma	Leipzig	Laila	Female	183.6	1738	2395	3194	1738	2707	36	498	0.18	-0.19	165	1268	5871	2395	6106	2395	3156	2959	5871	0.39	0	2959	0.34	0.52
L_942_1471_1.lma	Leipzig	Laila	Female	194.4	3147	2677	3335	2677	2881	26	94	0.08	-0.16	113	268	3147	2677	5636	2677	2920	2724	3194	0.62	0.04	2865	0.2	0.36
L_942_1472_1.lma	Leipzig	Laila	Female	135	2254	1174	2442	1174	2205	126	808	0.27	-0.13	154	990	2254	705	6481	517	4278	4885	705	0.33	1	4321	0.43	0.54
L_942_1486_1.lma	Leipzig	Laila	Female	218.7	3147	2630	3241	2583	2852	22	122	0.08	-0.19	72	191	6341	2630	6341	2583	3157	2677	6341	0.54	0	3147	0.33	0.56
L_942_1487_1.lma	Leipzig	Laila	Female	189	3053	2771	3053	2301	2603	24	216	0	-0.19	68	514	3053	2771	4603	2301	2700	2771	3053	0.23	0	2301	0.19	0.37
L_942_1488_1.lma	Leipzig	Laila	Female	207.9	3194	2536	3194	2536	2683	14	113	0	-0.16	96	258	3194	2536	5166	2536	2783	2630	5119	0.34	0.96	2630	0.16	0.33
L_942_1489_1.lma	Leipzig	Laila	Female	232.2	2536	2536	3194	2536	2737	37	250	0.14	-0.11	91	424	4368	2536	5871	2536	2985	2771	2912	0.35	0.02	2912	0.38	0.58
L_942_1490_1.lma	Leipzig	Laila	Female	162	3100	2442	3100	2395	2624	43	235	0	-0.15	98	338	3100	4697	4791	2395	2739	2771	3100	0.19	0	2020	0.24	0.45
B_945_1709_2.lma	Beauval	Harapan	Female	213.3	2912	1550	4274	1550	2952	185	1681	0.87	-0.22	301	1626	5683	1550	8266	1550	3936	2630	1550	0.65	1	5589	0.13	0.25
B_945_1710_6.lma	Beauval	Harapan	Female	224.1	2677	2207	3335	1691	2921	81	822	0.27	-0.11	287	1424	845	2207	6247	658	2992	3194	705	0.6	0.05	3147	0.23	0.47
B_945_1712_11.lma	Beauval	Harapan	Female	313.2	2818	2160	4133	1503	2639	195	1277	0.86	0	468	1487	1174	1409	7468	658	3723	2583	1174	0.68	0.04	4978	0.42	0.65
B_945_1714_1.lma	Beauval	Harapan	Female	318.6	2020	1550	3804	1315	2004	175	1644	0.71	-0.12	325	1942	986	1550	8031	658	3158	2067	1691	0.51	0.74	5636	0.4	0.51
B_945_1714_17.lma	Beauval	Harapan	Female	232.2	2489	1691	4133	1409	2662	234	1418	0.93	-0.02	428	1498	2489	1221	6294	658	3704	2489	2489	0.84	0	5354	0.24	0.4
B_945_1714_2.lma	Beauval	Harapan	Female	359.1	2583	1127	2865	1127	2196	72	798	0.08	-0.25	159	1553	2583	751	7233	751	2491	2395	2583	0.43	0	5354	0.25	0.41
B_945_1714_20.lma	Beauval	Harapan	Female	359.1	2301	1409	4133	1409	2630	271	1343	0.78	-0.03	521	1552	1174	1127	8125	705	3357	2442	845	0.65	0.96	7186	0.23	0.31
B_945_1714_21.lma	Beauval	Harapan	Female	272.7	1503	2536	3992	1456	2670	168	1747	0.95	-0.13	336	1603	1503	1268	6434	798	3936	2442	1127	0.78	0.03	5589	0.21	0.31
B_945_1714_24.lma	Beauval	Harapan	Female	383.4	1456	1315	3710	1268	2504	96	770	0.8	-0.18	372	1829	1033	986	7750	658	3697	5260	1221	0.6	0.01	5166	0.22	0.41
B_945_1714_26.lma	Beauval	Harapan	Female	297	1597	1644	3147	1315	2731	73	1447	0.03	-0.19	126	1782	6200	1644	6434	1644	4299	2442	2395	0.71	0.98	4227	0.2	0.36
B_945_1714_28.lma	Beauval	Harapan	Female	305.1	2254	1362	3710	1268	2414	202	1371	0.92	-0.06	391	1426	845	658	11131	658	3130	2160	2254	0.78	0.07	8313	0.31	0.54
B_945_1714_3.lma	Beauval	Harapan	Female	302.4	2865	1409	4086	1409	2690	118	1174	0.76	-0.06	429	1473	2865	1033	6951	845	3378	2395	2771	0.5	0.03	4603	0.32	0.5
B_945_1714_30.lma	Beauval	Harapan	Female	396.9	3476	1409	3710	1268	2450	82	1550	0.79	-0.19	253	1748	3476	939	6012	705	2819	2442	892	0.51	0.02	3992	0.23	0.42
B_945_1714_32.lma	Beauval	Harapan	Female	396.9	1362	1268	3663	1268	2368	111	1531	0.76	-0.23	294	1872	1362	1174	5683	705	2727	5636	1362	0.35	0.97	2771	0.28	0.45
B_945_1714_33.lma	Beauval	Harapan	Female	315.9	2724	1738	3945	1362	2621	248	1315	0.8	-0.04	370	1421	705	1738	7280	705	3867	5683	751	0.28	0.91	4932	0.3	0.43
B_945_1714_4.lma	Beauval	Harapan	Female	340.2	1691	2067	3429	1221	2443	79	1127	0.01	-0.28	134	1563	4415	2067	6669	705	2818	2160	3429	0.64	0.01	3382	0.26	0.49
B_945_1743_10.lma	Beauval	Harapan	Female	278.1	3100	1550	4509	1550	2916	90	1127	0.82	0.01	464	1572	1033	1268	6106	845	3574	5636	1268	0.43	1	3100	0.55	0.8
B_945_1743_15.lma	Beauval	Harapan	Female	413.1	2395	1973	4509	1550	2799	200	1231	0.6	-0.02	671	1766	2395	751	9581	658	3272	4368	751	0.65	1	6434	0.51	0.82
B_945_1743_16.lma	Beauval	Harapan	Female	324	3429	1550	3616	1409	2567	57	1597	0.94	-0.36	102	1945	3429	751	10708	751	3281	3288	1503	0.1	0.99	6247	0.55	0.83
B_945_1743_18.lma	Beauval	Harapan	Female	270	1409	2020	3382	1409	2421	236	1418	0.78	-0.18	548	1428	1127	1362	5777	705	2573	3053	798	0.29	0.07	4556	0.69	0.83
B_945_1743_19.lma	Beauval	Harapan	Female	291.6	1550	2865	4086	1409	2615	248	1334	0.88	-0.14	501	1729	1221	1268	10380	658	4621	5260	2677	0.61	0.05	9581	0.59	0.8
B_945_1753_1.lma	Beauval	Harapan	Female	283.5	2489	1832	3710	1268	2494	276	1296	0.72	-0.35	331	1615	892	1033	7045	658	3351	3100	3523	0.19	0.03	4556	0.69	0.79
B_945_1725_6.lma	Beauval	Harapan	Female	132.3	2771	1174	2959	1033	2366	207	1277	0.1	-0.57	513	1600	2771	845	5730	798	2976	3006	1409	0.54	0.94	4227	0.31	0.49
B_945_1732_1.lma	Beauval	Harapan	Female	116.1	3851	3053	3851	2818	3076	52	204	0	-0.22	94	561	3851	658	5918	658	3152	3100	658	0.43	1	2959	0.45	0.63
B_945_1732_2.lma	Beauval	Harapan	Female	191.7	2301	1785	4415	1785	2987	140	1343	0.93	-0.12	358	1599	1174	1362	7750	658	4242	6763	2067	0.26	0.03	5119	0.42	0.59
D_T5_1790_5.lma	Dortmund	Solo	Female	145.8	4744	3663	4744	3616	3776	22	235	0	-0.22	140	691	611	3663	7421	611	3973	3710	611	0.53	0	3992	0.76	0.87
D_T5_1777_1.lma	Dortmund	Solo	Female	391.5	3757	1409	3945	1409	2958	141	958	0.1	-0.3	291	1453	7468	470	7656	376	3775	7515	892	0.22	0.86	3851	0.74	0.87
D_T5_1777_13.lma	Dortmund	Solo	Female	288.9	3851	2254	3945	1409	3038	167	1353	0.88	-0.37	342	1734	3851	564	7609	470	4261	7327	1174	0.28	0.98	3804	0.61	0.88
D_T5_1777_14.lma	Dortmund	Solo	Female	240.3	3757	1409	3757	1409	2930	36	658	0	-0.46	107	606	3757	1409	7374	1409	3148	2583	2395	0.65	0.99	3710	0.58	0.88
D_T5_1777_17.lma	Dortmund	Solo	Female	450.9	2067	1550	4509	1550	3135	233	1550	0.73	-0.07	628	1532	1033	845	20477	376	3287	3804	6904	0.08	0.98	19491	0.69	0.88
D_T5_1777_18.lma	Dortmund	Solo	Female	302.4	3804	2114	4133	1409	3126	169	1475	0.63	-0.21	500	1395	3804	705	5495	423	3080	3710	705	0.13	1	2583	0.68	0.88
D_T5_1777_2.lma	Dortmund	Solo	Female	229.5	3945	2207	4274	1550	2904	146	1766	0.01	-0.35	307	1978	1080	423	8078	423	4283	2536	751	0.65	0.01	6716	0.73	0.87
D_T5_1777_20.lma	Dortmund	Solo	Female	426.6	3757	1644	4744	1644	3093	217	1860	0.54	-0.15	508	2166	3757	892	7233	517	2686	3710	1315	0.15	0.98	4838	0.64	0.88
D_T5_1777_22.lma	Dortmund	Solo	Female	326.7	3804	4697	4744	1644	3374	193	1465	0.9	0.02	613	1755	798	658	7468	658	3785	3757	798	0.1	0	3851	0.66	0.88
D_T5_1777_23.lma	Dortmund	Solo	Female	210.6	3945	2442	4368	1503	3227	100	892	0.91	-0.45	231	1813	3945	1362	7421	1362	3886	3804	4697	0.09	0.97	3757	0.63	0.88
D_T5_1777_24.lma	Dortmund	Solo	Female	245.7	3757	2442	4415	1550	3246	116	1456	0.8	-0.24	384	1479	3757	1174	7233	1174	4079	3710	1174	0.19	1	3616	0.64	0.87
D_T5_1777_25.lma	Dortmund	Solo	Female	234.9	3851	4227	4650	2301	3304	134	1869	0.84	-0.22	316	1639	3851	1362	7327	1127	4310	7327	2301	0.23	0.85	3710	0.61	0.88
D_T5_1777_6.lma	Dortmund	Solo	Female	240.3	3523	2536	3945	1503	3024	82	1573	0.99	-0.38	205	1685	3523	1315	7421	1315	4321	5824	2348	0.55	0.92	4932	0.59	0.86
D_T5_1777_7.lma	Dortmund	Solo	Female	253.8	3898	2442	4744	2020	3247	186	1400	0.81	-0.18	427	1741	3898	470	5918	470	3313	3569	3616	0.29	0.98	3992	0.64	0.88
D_T5_1777_8.lma	Dortmund	Solo	Female	280.8	4650	1832	4650	1832	3209	134	1902	0	-0.26	368	1939	517	1315	9863	517	4102	7374	658	0.27	0.02	6622	0.69	0.88
D_T5_1778_1.lma	Dortmund	Solo	Female	256.5	4368	2489	5072	2160	3434	170	1531	0.79	-0.38	298	2122	564	1268	7796	564	4737	7468	564	0.41	0	3898	0.59	0.87
D_T5_1778_3.lma	Dortmund	Solo	Female	345.6	1691	3335	4744	1691	3296	223	1440	0.88	-0.08	439	1858	517	1268	7468	517	3616	3476	517	0.34	0	3898	0.62	0.88
D_T5_1779_1.lma	Dortmund	Solo	Female	272.7	4791	3006	5025	1785	3567	88	1024	0.01	-0.31	486	2107	4791	423	7515	423	3589	2724	4462	0.59	0.07	4039	0.62	0.87
D_T5_1779_5.lma	Dortmund	Solo	Female	283.5	2912	2677	4650	2160	3123	146	1306	0.95	-0.28	296	2151	2912	517	7421	376	2998	3429	2912	0.38	0	3804	0.61	0.87
D_T5_1779_7.lma	Dortmund	Solo	Female	251.1	1738	1550	4086	1550	3003	152	1378	0.65	-0.35	374	2032	892	470	7374	376	3158	3663	376	0.18	0.97	3663	0.69	0.86
D_T5_1779_8.lma	Dortmund	Solo	Female	504.9	4415	1550	4415	1503	3022	181	1890	0	-0.14	574	2087	517	517	7515	423	3336	3757	1691	0.1	0.92	4509	0.7	0.86
D_T5_1781_10.lma	Dortmund	Solo	Female	291.6	3523	1456	3945	1409	2862	148	1625	0.89	-0.34	368	1755	3523	1315	10661	1080	3837	3476	3523	0.15	0	7139	0.68	0.88
D_T5_1781_11.lma	Dortmund	Solo	Female	334.8	3194	3945	4321	1597	3238	130	1491	0.98	-0.08	434	1866	3194	986	7421	423	3589	3429	3194	0.36	0	3757	0.67	0.88
D_T5_1781_14.lma	Dortmund	Solo	Female	502.2	3757	3288	4415	1503	2852	164	1409	0.8	-0.17	536	2188	3757	986	7421	376	3278	7374	423	0.15	0.92	4650	0.7	0.87
D_T5_1781_17.lma	Dortmund	Solo	Female	321.3	3851	2724	3851	1503	2885	98	1418	0	-0.42	217	1348	798	423	7327	423	3722	2771	517	0.54	0.98	4086	0.6	0.87
D_T5_1781_19.lma	Dortmund	Solo	Female	359.1	4368	2067	4368	1503	2886	173	1766	0	-0.31	273	1732	705	611	7327	376	2976	3335	705	0.33	0	3663	0.56	0.87
D_T5_1781_20.lma	Dortmund	Solo	Female	515.7	2301	2442	4086	1456	2969	178	1672	0.61	-0.11	507	1372	1174	705	7186	470	3057	2348	1174	0.45	0	4415	0.65	0.88
D_T5_1781_22.lma	Dortmund	Solo	Female	396.9	1409	1738	3710	1268	2623	137	1287	0.02	-0.3	361	2249	939	564	15640	376	2799	3569	1973	0.25	0.86	13667	0.74	0.88
D_T5_1781_3.lma	Dortmund	Solo	Female	305.1	3429	2771	3710	1268	2956	194	1259	0.01	-0.28	406	2046	3945	1127	7374	470	3844	6951	611	0.32	0.97	3663	0.64	0.87
D_T5_1781_37.lma	Dortmund	Solo	Female	348.3	2912	1597	3710	1268	2647	119	1202	0.23	-0.42	306	2494	470	517	7515	470	3149	3053	470	0.4	0.02	3804	0.66	0.88
D_T5_1781_38.lma	Dortmund	Solo	Female	364.5	3710	1597	3710	1315	2627	85	1409	0	-0.43	246	1227	3710	1174	7468	376	3711	4932	470	0.5	0.95	3569	0.67	0.88
D_T5_1781_4.lma	Dortmund	Solo	Female	326.7	1268	2912	3710	1268	2707	139	1277	0.03	-0.34	411	2408	517	376	7327	376	2968	2536	1315	0.52	0.82	4180	0.77	0.88
D_T5_1781_45.lma	Dortmund	Solo	Female	448.2	2959	1973	4509	1644	3040	174	1061	0.56	-0.16	556	1547	470	986	7092	423	3015	3335	3288	0.25	0.01	5354	0.66	0.88
D_T5_1781_46.lma	Dortmund	Solo	Female	442.8	3663	1550	4368	1503	2768	120	1738	0.56	-0.21	453	1731	3663	611	7280	564	3564	6857	564	0.26	0.96	4509	0.71	0.87
D_T5_1781_48.lma	Dortmund	Solo	Female	572.4	1832	3194	4321	1503	2856	162	1681	1	-0.12	609	2051	376	517	7515	376	3106	3194	376	0.3	0	4086	0.75	0.88
D_T5_1781_5.lma	Dortmund	Solo	Female	332.1	3757	2301	4086	1409	2861	290	1710	0.59	-0.32	446	1609	3757	1033	7280	423	2729	3476	1315	0.28	0.8	3710	0.73	0.87
D_T5_1781_50.lma	Dortmund	Solo	Female	483.3	3710	3804	4086	1409	3005	143	939	0.89	-0.14	464	1537	3710	3804	7374	892	3800	2536	3804	0.5	1	3710	0.51	0.81
D_T5_1781_51.lma	Dortmund	Solo	Female	332.1	2301	2254	4133	1503	2836	93	921	0.74	-0.34	276	1780	13714	470	13714	376	3285	3053	13714	0.39	0	13010	0.61	0.88
D_T5_1781_52.lma	Dortmund	Solo	Female	351	3804	3194	4697	1832	3249	196	1653	0.96	-0.18	412	1948	3804	1033	7609	423	3934	2442	1033	0.62	0.98	3851	0.62	0.87
D_T5_1781_57.lma	Dortmund	Solo	Female	313.2	3945	1691	4650	1644	3000	149	1146	0.83	-0.33	382	2245	3945	705	7468	470	2807	3335	517	0.38	0.99	3757	0.59	0.87
D_T5_1781_7.lma	Dortmund	Solo	Female	661.5	3804	1644	4791	1644	3356	285	2095	0.81	0	673	1712	3804	423	7374	376	3060	7280	517	0.17	0.88	4603	0.7	0.88
D_T5_1781_8.lma	Dortmund	Solo	Female	496.8	3992	2067	4791	1644	3206	254	1879	0.53	-0.09	583	1768	3992	751	7421	376	3204	3288	892	0.29	0.98	5166	0.66	0.88
D_T5_1790_13.lma	Dortmund	Solo	Female	367.2	1926	1503	3992	1409	2946	165	1268	0.02	-0.27	373	1874	11037	7421	20853	423	3659	2348	20853	0.64	0.85	20196	0.77	0.87
D_T5_1790_15.lma	Dortmund	Solo	Female	248.4	2020	2442	3851	1973	3094	50	582	0.04	-0.33	290	1786	2020	658	7515	376	3934	2818	2020	0.6	0	3757	0.72	0.88
D_T5_1790_4.lma	Dortmund	Solo	Female	221.4	3945	1644	4556	1644	3088	72	1832	0.86	-0.52	181	2187	3945	1644	7280	1644	3561	3476	2301	0.44	0.95	3663	0.75	0.87
D_T5_1790_8.lma	Dortmund	Solo	Female	245.7	3804	1738	3898	1738	3197	63	629	0.09	-0.39	194	945	3804	986	10849	423	3689	3616	845	0.32	0.96	10427	0.61	0.86
D_T5_1791_15.lma	Dortmund	Solo	Female	386.1	1738	1691	4697	1644	3294	179	1569	0.77	-0.1	565	1888	658	517	7562	376	3756	3476	7327	0.37	0.92	6951	0.7	0.88
D_T5_1791_27.lma	Dortmund	Solo	Female	602.1	2301	2254	4086	1409	2981	130	1080	0.73	-0.03	594	1738	470	376	7327	376	3131	2348	423	0.45	0.01	4885	0.7	0.88
D_T5_1791_3.lma	Dortmund	Solo	Female	367.2	1832	2677	4086	1409	2851	112	1663	0.75	-0.32	253	2038	8595	2677	15311	611	4169	2489	8595	0.63	0	14701	0.68	0.88
D_T5_1791_32.lma	Dortmund	Solo	Female	472.5	2583	2771	4415	1503	2972	106	845	0.85	-0.09	457	1713	1174	611	17988	376	3106	2677	3476	0.47	0.98	14513	0.64	0.88
D_T5_1791_4.lma	Dortmund	Solo	Female	307.8	3241	4509	4697	1644	3202	203	1926	0.02	-0.26	353	2132	751	705	7374	517	3881	3429	705	0.42	0.93	5777	0.75	0.88
D_T5_1791_6.lma	Dortmund	Solo	Female	283.5	3804	2630	3804	2160	3229	40	488	0	-0.28	124	478	3804	1080	7327	705	3976	3523	2724	0.36	0.89	3663	0.76	0.87
D_T5_1791_9.lma	Dortmund	Solo	Female	507.6	2865	2020	4274	1503	2969	200	1653	0.01	-0.13	555	1999	10239	892	10239	376	3614	3335	10239	0.34	0	9581	0.72	0.88
D_T5_1793_8.lma	Dortmund	Solo	Female	315.9	4509	2442	4603	2067	3238	192	1409	0.71	-0.19	373	1585	376	1174	7327	376	3298	3288	3429	0.4	0.96	3992	0.65	0.87
D_T5_1793_9.lma	Dortmund	Solo	Female	264.6	3757	3147	4415	2067	3119	74	1728	0.77	-0.26	302	1626	3757	1315	7186	1315	3422	2489	3006	0.67	0.97	3569	0.6	0.87
D_T5_1802_2.lma	Dortmund	Solo	Female	305.1	3898	2348	4838	2067	3219	119	1381	0.76	-0.21	323	1905	3898	2348	7233	2067	3621	3523	2348	0.39	1	3663	0.74	0.86
D_T5_1802_4.lma	Dortmund	Solo	Female	310.5	2489	2442	4650	2395	3177	197	1378	0.74	-0.17	485	1779	705	611	13245	517	3644	2442	2442	0.59	0.97	12728	0.64	0.86
D_T5_1802_6.lma	Dortmund	Solo	Female	558.9	3757	4697	4697	1597	2982	154	1296	0.95	-0.09	530	2166	3757	376	7374	376	3464	3382	376	0.27	1	3945	0.7	0.88
D_T5_1803_13.lma	Dortmund	Solo	Female	399.6	3945	3100	3992	1409	3068	124	1092	0.77	-0.2	382	1359	798	1174	7843	517	3627	3382	1174	0.37	0.99	5401	0.62	0.86
D_T5_1803_14.lma	Dortmund	Solo	Female	437.4	3663	1550	3992	1503	2920	191	1653	0.85	-0.2	428	2067	3663	658	10004	376	3532	6716	10004	0.3	0.99	9628	0.63	0.86
D_T5_1803_18.lma	Dortmund	Solo	Female	432	3710	3053	4415	1503	2912	156	2160	0.96	-0.19	475	2171	3710	705	5495	376	2929	2395	1550	0.52	0.98	3476	0.72	0.87
D_T5_1803_5.lma	Dortmund	Solo	Female	529.2	3804	2771	4086	1409	2982	186	1785	0.71	-0.16	444	1585	3804	986	13714	376	4416	5542	13714	0.42	0.95	13104	0.68	0.88
D_T5_1804_1.lma	Dortmund	Solo	Female	461.7	3429	1409	4086	1409	3076	192	1728	0.94	-0.05	537	1523	658	986	11695	376	3351	3429	3898	0.25	0.99	10943	0.7	0.86
D_T5_1796_1.lma	Dortmund	Solo	Female	224.1	3992	3053	3992	2771	3379	22	132	0	-0.3	82	272	3992	3053	7562	2771	3698	3335	3100	0.5	0.98	3851	0.46	0.71
D_T5_1796_2.lma	Dortmund	Solo	Female	218.7	3992	3335	3992	2771	3438	23	188	0	-0.34	94	538	3992	3335	7703	2771	3534	3147	2771	0.65	0.95	3851	0.47	0.73
D_T5_1822_1.lma	Dortmund	Solo	Female	113.4	2865	2536	4791	2348	2745	170	1447	0.66	-0.12	201	2082	2865	2536	4791	2348	2745	2583	2771	0.56	0.15	2395	0.25	0.44
D_T5_1823_1.lma	Dortmund	Solo	Female	156.6	3147	2207	3147	2160	2546	32	122	0	-0.34	60	199	3147	2207	3147	2160	2546	2536	3053	0.56	0.02	188	0.15	0.28
D_T5_1829_18.lma	Dortmund	Solo	Female	283.5	3710	2160	5072	2160	3469	91	2010	0.87	-0.2	235	1953	3710	1268	7468	1268	4689	6998	3476	0.66	0.99	3757	0.45	0.86
D_T5_1829_20.lma	Dortmund	Solo	Female	270	3569	3569	3663	2630	3334	25	579	0.22	-0.24	205	783	7186	3569	8125	1644	4453	3569	2630	0.57	0.97	5495	0.53	0.85
D_T5_1829_3.lma	Dortmund	Solo	Female	232.2	4415	3757	4650	2395	3627	102	836	0.85	0.03	219	1177	4415	3757	7468	1127	4203	3757	4415	0.35	0	4603	0.64	0.88
D_T5_1829_5.lma	Dortmund	Solo	Female	194.4	3710	3288	3757	2771	3511	60	573	0.77	-0.19	142	600	3710	3288	8078	2771	4062	3382	3476	0.63	0.93	5307	0.5	0.85
D_T5_1830_7.lma	Dortmund	Solo	Female	307.8	3757	3663	3851	2348	3494	65	629	0.25	-0.14	224	858	3757	1268	7468	376	3843	3757	376	0.3	0.98	3757	0.46	0.86
D_T5_1781_15.lma	Dortmund	Solo	Female	837	1973	1409	3851	1315	2958	143	1587	0.63	-0.02	661	1655	611	751	8313	423	4048	7421	611	0.15	0	4368	0.63	0.88
D_T5_1781_29.lma	Dortmund	Solo	Female	610.2	3288	1362	3851	1362	2968	92	1315	0.02	-0.05	587	1871	4321	1362	7374	470	3759	3569	4321	0.19	0	4133	0.6	0.88
D_T5_1781_33.lma	Dortmund	Solo	Female	718.2	1503	3241	3851	1315	2850	140	1146	0.02	-0.02	627	1637	1503	423	7656	423	3469	6904	611	0.17	0.01	7045	0.69	0.89
D_T5_1781_34.lma	Dortmund	Solo	Female	899.1	3616	3851	4180	1456	2868	129	1841	0.62	0	662	1412	3616	4650	11037	423	3534	2348	658	0.29	0.63	7374	0.67	0.89
D_T5_1781_39.lma	Dortmund	Solo	Female	872.1	3898	2912	4227	1597	3049	147	1447	0.26	-0.02	612	1449	3898	517	7796	470	3280	3476	1268	0.8	0.46	3898	0.67	0.87
D_T5_1781_49.lma	Dortmund	Solo	Female	880.2	1738	1738	4227	1456	2955	190	2198	0.45	-0.03	657	1614	845	705	7515	705	3514	3335	845	0.18	0	4556	0.61	0.87
D_T5_1790_6.lma	Dortmund	Solo	Female	737.1	3945	4227	4227	1597	3205	150	1165	1	-0.03	571	1420	3945	658	7890	658	4225	7656	3945	0.64	0.46	4744	0.68	0.87
D_T5_1791_10.lma	Dortmund	Solo	Female	688.5	3757	1738	4039	1597	3064	71	1306	0.96	-0.07	473	1376	658	564	9065	423	3737	3523	658	0.76	0	6341	0.66	0.88
D_T5_1791_11.lma	Dortmund	Solo	Female	648	1691	1456	4227	1456	3192	84	1425	0.43	-0.05	495	1773	1268	611	7515	423	3866	3006	1268	0.86	0	3663	0.64	0.88
D_T5_1791_17.lma	Dortmund	Solo	Female	807.3	1456	1503	3851	1315	2900	128	1503	0.42	-0.07	545	1949	470	1503	7468	470	3625	3476	1503	0.12	1	4227	0.67	0.88
D_T5_1791_22.lma	Dortmund	Solo	Female	788.4	1409	3382	3851	1362	2911	133	1362	0.43	-0.05	635	1822	1409	470	7421	423	3118	2583	564	0.28	0.62	5072	0.75	0.87
D_T5_1791_31.lma	Dortmund	Solo	Female	820.8	3710	3382	3851	1362	2830	127	1484	0.4	-0.04	631	1262	7609	3382	14607	376	3474	3476	7609	0.61	0	14184	0.69	0.88
D_T5_1791_36.lma	Dortmund	Solo	Female	888.3	2818	1644	3710	1268	2593	89	1428	0.49	-0.03	670	1582	2818	1644	14607	470	3094	2395	6669	0.81	0.01	10427	0.75	0.88
D_T5_1793_4.lma	Dortmund	Solo	Female	615.6	3710	1879	3710	1268	2790	101	1681	0	-0.13	577	1234	3804	517	7468	376	3375	3476	470	0.19	0.97	3710	0.7	0.88
D_T5_1803_1.lma	Dortmund	Solo	Female	742.5	3710	2489	3945	1409	2998	63	1052	0.95	-0.06	482	1286	3710	423	7609	423	4122	7186	423	0.68	1	4791	0.61	0.86
D_T5_1803_15.lma	Dortmund	Solo	Female	999	3476	2301	4039	1409	2872	133	1409	0.69	-0.03	712	1394	10427	1174	10427	376	3332	3241	10427	0.15	0	6716	0.68	0.87
D_T5_1803_6.lma	Dortmund	Solo	Female	769.5	2301	3100	4321	1644	3121	147	1672	0.58	-0.01	632	1413	13479	658	13479	376	3566	2348	13479	0.3	0	9722	0.73	0.88
D_T5_1803_7.lma	Dortmund	Solo	Female	680.4	3804	1503	4039	1503	3162	153	1456	0.13	0	523	1643	3804	705	15264	376	4553	3663	15264	0.8	0.01	13526	0.76	0.87
D_T5_1804_28.lma	Dortmund	Solo	Female	828.9	4321	2301	4415	1503	3130	58	1616	0.99	-0.02	397	1476	9252	2301	9252	1127	4065	2348	9252	0.87	0	5495	0.57	0.86
D_T5_1804_3.lma	Dortmund	Solo	Female	785.7	3569	2395	4697	1644	3139	101	1841	0.44	-0.03	506	1710	19444	658	19444	376	4166	2489	611	0.36	0.01	18975	0.68	0.87
D_T5_1804_7.lma	Dortmund	Solo	Female	756	3757	2301	4415	1503	3090	108	1494	0.91	-0.05	500	1594	3757	1080	20431	470	3857	3569	16110	0.18	0.99	18928	0.55	0.87
D_T5_1830_20.lma	Dortmund	Solo	Female	893.7	1879	1644	4415	1503	2988	195	1747	0.9	-0.01	659	1512	18505	18176	18505	423	3287	2442	423	0.82	0.99	16157	0.67	0.88
D_T5_1830_21.lma	Dortmund	Solo	Female	661.5	3382	4415	4415	1503	3044	101	1052	1	0	488	1546	376	1268	7186	376	3476	7045	705	0.64	0.96	4838	0.59	0.87
D_T5_1830_22.lma	Dortmund	Solo	Female	653.4	3382	4321	4368	1503	2724	75	1597	0.98	-0.05	355	1906	3382	1362	7280	1080	3338	3053	1315	0.16	1	4838	0.74	0.87
D_T5_1830_23.lma	Dortmund	Solo	Female	1120.5	1926	1503	4415	1503	2750	180	2311	0.5	-0.03	616	1964	16579	751	22356	517	3533	2489	16579	0.22	0	21840	0.69	0.88
D_T5_1830_24.lma	Dortmund	Solo	Female	993.6	2724	3804	4415	1503	3034	146	1259	0.38	-0.02	541	1493	2724	798	11601	751	2982	3147	11601	0.15	0.01	10849	0.66	0.87
D_T5_1781_30.lma	Dortmund	Solo	Female	351	3804	2677	4556	1597	3263	95	911	0.84	-0.2	308	1702	3804	1080	7374	1080	5058	7233	1080	0.28	1	4932	0.51	0.86
D_T5_1781_31.lma	Dortmund	Solo	Female	337.5	3804	4227	4603	1691	3196	140	1597	0.79	-0.15	463	1671	3804	1315	7468	423	3713	2301	1597	0.6	0.88	3757	0.6	0.88
D_T5_1781_32.lma	Dortmund	Solo	Female	283.5	2207	2442	4509	1691	3048	150	1691	0.94	-0.37	308	2285	611	658	7562	611	3657	2912	2348	0.54	0.81	3757	0.61	0.87
D_T5_1781_44.lma	Dortmund	Solo	Female	572.4	3757	2489	4697	1597	3017	240	1663	0.56	-0.08	623	1724	3757	564	7421	376	2864	3335	939	0.2	0.81	4086	0.69	0.89
D_T5_1781_47.lma	Dortmund	Solo	Female	367.2	3616	3851	3945	1503	2833	124	1456	0.68	-0.25	332	1824	1268	939	7045	423	3015	3429	1268	0.29	0	3569	0.72	0.88
D_T5_1781_54.lma	Dortmund	Solo	Female	243	3663	3851	3851	2395	3359	36	971	1	-0.33	253	1174	7327	3851	7468	2395	5604	6904	2395	0.64	0.99	4978	0.42	0.65
D_T5_1787_4.lma	Dortmund	Solo	Female	221.4	1832	1503	4368	1503	3367	95	1503	0.01	-0.32	270	2137	4556	1221	8689	1221	4891	5495	1221	0.77	1	4885	0.62	0.88
D_T5_1790_19.lma	Dortmund	Solo	Female	272.7	3241	2301	4697	1832	3361	180	1728	0.92	-0.16	412	1665	564	517	7562	470	4644	6998	1080	0.4	0.94	3757	0.71	0.87
D_T5_1790_21.lma	Dortmund	Solo	Female	351	1597	2020	4509	1550	3168	302	1738	0.56	-0.16	576	2069	1127	4697	11131	470	3822	7468	1362	0.2	0.89	10004	0.71	0.86
D_T5_1790_22.lma	Dortmund	Solo	Female	253.8	2865	1691	4650	1691	3209	183	1902	0.01	-0.39	334	2277	705	1550	10286	423	4286	7562	705	0.4	0	9863	0.73	0.87
D_T5_1791_1.lma	Dortmund	Solo	Female	202.5	3710	2254	3757	2254	3177	17	85	0.14	-0.52	175	373	3710	2254	7562	1315	4739	7374	2254	0.2	1	3710	0.74	0.88
D_T5_1791_18.lma	Dortmund	Solo	Female	248.4	3804	3616	4509	1644	3443	150	1259	0.81	-0.2	331	1405	1409	892	7468	376	4579	3569	1409	0.52	0	3710	0.73	0.87
D_T5_1791_19.lma	Dortmund	Solo	Female	307.8	2912	1926	4791	1644	3186	244	1550	0.62	-0.23	494	2000	2912	564	22121	376	3474	3241	376	0.4	0.94	21558	0.72	0.88
D_T5_1791_20.lma	Dortmund	Solo	Female	297	1644	3569	3804	1644	3101	94	1071	0.03	-0.34	374	2327	517	1080	7468	517	3654	7280	658	0.43	0.02	3710	0.72	0.88
D_T5_1791_21.lma	Dortmund	Solo	Female	178.2	3757	3476	3992	1879	3165	143	1080	0.89	-0.45	299	1366	3757	3476	5166	798	3105	3616	2818	0.22	0.88	3053	0.81	0.89
D_T5_1791_25.lma	Dortmund	Solo	Female	270	1926	2254	4039	1926	3205	77	1237	0.91	-0.25	314	1852	939	2254	7327	939	4097	2536	3757	0.75	0.01	3663	0.68	0.88
D_T5_1791_26.lma	Dortmund	Solo	Female	356.4	4321	2114	4368	1644	3166	222	1437	0.63	-0.19	433	1567	4321	470	17190	423	3736	2348	13526	0.58	0.04	14795	0.74	0.88
D_T5_1791_29.lma	Dortmund	Solo	Female	315.9	3569	2207	4415	1550	2860	124	1738	0.67	-0.34	345	1877	3569	1174	7233	470	3135	3663	705	0.14	0.84	3616	0.77	0.88
D_T5_1791_33.lma	Dortmund	Solo	Female	315.9	3663	2348	3663	1550	2903	38	376	0	-0.39	150	510	3663	1456	7092	1456	3227	2348	2301	0.69	0.93	3523	0.69	0.88
D_T5_1791_34.lma	Dortmund	Solo	Female	226.8	3663	1738	4509	1738	3039	139	1847	0.98	-0.38	272	2188	3663	19914	19914	470	3880	2442	19914	0.69	0.99	9910	0.8	0.88
D_T5_1791_35.lma	Dortmund	Solo	Female	386.1	2067	4462	4462	1550	3056	160	2320	0.88	-0.12	551	1807	564	1080	17941	564	3090	2865	17941	0.42	0.81	14654	0.76	0.89
D_T5_1791_37.lma	Dortmund	Solo	Female	510.3	3523	4744	4791	1644	2944	166	1860	0.99	-0.05	573	2044	3523	4744	7233	705	2851	3616	1926	0.11	0.59	4039	0.75	0.88
D_T5_1791_39.lma	Dortmund	Solo	Female	329.4	2301	2912	4039	1644	3066	142	1362	0.79	-0.2	425	1538	2301	1456	7374	517	3557	2536	2067	0.59	0.86	3663	0.75	0.88
D_T5_1791_40.lma	Dortmund	Solo	Female	245.7	3616	1879	3898	1879	3121	69	1190	0.93	-0.32	259	1354	3616	1879	8548	1879	3244	3429	3851	0.38	0.94	5683	0.76	0.88
D_T5_1791_41.lma	Dortmund	Solo	Female	261.9	4368	2771	4556	1644	3239	183	1785	0.69	-0.16	376	1489	16250	1409	16720	1174	3552	2912	16250	0.52	0	13198	0.76	0.89
D_T5_1791_42.lma	Dortmund	Solo	Female	448.2	3523	3710	4415	1503	3031	272	2095	0.45	-0.05	741	1561	3523	892	7045	845	2742	3523	3429	0.19	0.62	3523	0.79	0.88
D_T5_1791_43.lma	Dortmund	Solo	Female	278.1	3382	1597	3710	1503	2759	79	1137	0.78	-0.48	255	1630	3382	1315	4556	1315	2791	2442	1362	0.6	0.97	2348	0.7	0.88
D_T5_1791_5.lma	Dortmund	Solo	Female	234.9	2395	1738	3804	1738	3141	48	924	0.01	-0.42	187	1585	1362	1738	14888	1362	4282	3523	1362	0.45	0	13526	0.78	0.88
D_T5_1791_7.lma	Dortmund	Solo	Female	272.7	2536	2067	4086	1503	3107	103	1634	0.92	-0.37	261	1702	7374	1315	8454	1315	5332	7421	2301	0.36	0.97	5636	0.71	0.88
D_T5_1793_6.lma	Dortmund	Solo	Female	275.4	3898	3663	4415	1503	3303	114	1268	0.77	-0.24	338	1419	4509	1268	7374	611	3903	3382	4509	0.45	0	3898	0.73	0.89
D_T5_1803_11.lma	Dortmund	Solo	Female	280.8	3616	1503	3851	1503	2996	108	1400	0.83	-0.35	285	1423	3616	1503	7280	1503	3205	2912	3616	0.5	0.9	3757	0.71	0.86
D_T5_1804_15.lma	Dortmund	Solo	Female	326.7	2912	2207	3992	1644	3048	72	761	0.81	-0.18	421	1254	7796	1456	7796	1456	3226	3335	7796	0.34	0	4274	0.71	0.86
D_T5_1781_2.lma	Dortmund	Solo	Female	229.5	3804	2583	3804	1550	3311	111	1231	0	-0.32	177	1341	3804	845	7468	705	3966	7468	845	0.26	1	3757	0.65	0.88
D_T5_1781_23.lma	Dortmund	Solo	Female	234.9	3898	3288	4180	2442	3326	66	761	0.92	-0.32	248	1398	564	705	7750	564	4878	7045	564	0.43	0	3945	0.66	0.87
D_T5_1790_11.lma	Dortmund	Solo	Female	248.4	2724	2348	4368	2348	3227	109	1569	0.98	-0.29	231	1727	564	517	7233	423	3567	3429	564	0.52	0	4556	0.68	0.87
D_T5_1791_16.lma	Dortmund	Solo	Female	291.6	4556	2395	4556	1644	3369	98	1108	0	-0.22	328	1573	376	1315	7515	376	4135	3429	376	0.51	0	3710	0.67	0.88
D_T5_1793_2.lma	Dortmund	Solo	Female	151.2	3382	3429	3757	2583	3361	45	364	0.35	-0.3	234	490	3382	1221	7421	1221	4380	3429	1221	0.64	1	4274	0.72	0.86
D_T5_1829_10.lma	Dortmund	Solo	Female	232.2	3710	4368	4415	2254	3414	48	1045	0.99	-0.27	223	1520	3710	4368	7421	2254	4225	3523	2442	0.6	0.96	3710	0.43	0.75
D_T5_1829_12.lma	Dortmund	Solo	Female	221.4	3710	2301	3710	2301	3372	14	122	0	-0.35	214	440	3710	2301	7984	2301	5241	7280	2301	0.51	1	5636	0.29	0.62
D_T5_1829_14.lma	Dortmund	Solo	Female	253.8	3569	3851	3851	1456	3390	48	949	1	-0.26	281	1398	3569	1315	7421	1315	3809	3663	1315	0.52	1	3710	0.29	0.55
D_T5_1829_16.lma	Dortmund	Solo	Female	305.1	3663	3616	3710	1503	3274	67	1146	0.05	-0.31	249	1159	3663	1174	7890	611	4373	3569	611	0.54	0.99	5354	0.34	0.73
D_T5_1829_21.lma	Dortmund	Solo	Female	234.9	3523	1503	3663	1503	3209	22	395	0.22	-0.43	335	951	3523	1456	7233	611	3479	3616	3523	0.48	0	3569	0.41	0.78
D_T5_1829_8.lma	Dortmund	Solo	Female	210.6	3710	2630	3757	2630	3561	13	75	0.21	-0.2	150	567	3710	2630	7468	2630	4541	3710	2630	0.53	1	3757	0.26	0.59
D_T5_1830_17.lma	Dortmund	Solo	Female	286.2	2442	3382	3710	1973	3261	66	827	0.05	-0.25	268	1495	376	3382	7656	376	4270	3476	1221	0.56	0.98	5213	0.58	0.88
D_T5_1830_18.lma	Dortmund	Solo	Female	278.1	3476	3663	3710	1503	3342	98	1526	0.97	-0.23	246	1333	6951	1033	8031	1033	5148	3663	6951	0.39	0	3663	0.52	0.87
D_T5_1830_19.lma	Dortmund	Solo	Female	280.8	3616	1879	3710	1550	3287	38	761	0.14	-0.31	191	1098	7327	705	7421	705	4198	3523	1550	0.51	0.93	3710	0.34	0.76
D_T5_1830_2.lma	Dortmund	Solo	Female	245.7	3710	3710	3804	2677	3505	32	689	0.21	-0.23	204	694	7374	611	7562	611	5047	7421	611	0.51	1	3804	0.32	0.67
D_T5_1830_3.lma	Dortmund	Solo	Female	243	3569	1691	3663	1691	3374	48	517	0.08	-0.28	206	1117	3569	611	8125	611	4366	6951	3569	0.65	0	5307	0.63	0.86
D_T5_1830_6.lma	Dortmund	Solo	Female	288.9	3616	1691	3710	1691	3372	26	658	0.24	-0.26	217	1045	3616	1221	7468	1033	4723	7421	2677	0.32	0.98	3757	0.48	0.86
D_T5_1830_8.lma	Dortmund	Solo	Female	275.4	3335	1503	3992	1503	3172	69	977	0.01	-0.39	366	986	3335	376	8313	376	5049	5495	845	0.77	0.01	6059	0.55	0.87
D_T5_1830_8a.lma	Dortmund	Solo	Female	232.2	3710	2677	3710	2301	3454	50	611	0	-0.24	193	707	3710	5401	7421	2301	5000	3476	2301	0.65	0.98	3710	0.41	0.69
D_T5_1830_8b.lma	Dortmund	Solo	Female	213.3	3616	3710	3710	2254	3422	75	808	0.05	-0.3	248	830	3616	1221	7186	1221	3597	3710	3616	0.35	0	3616	0.35	0.73
D_T5_1830_8c.lma	Dortmund	Solo	Female	237.6	3663	2207	3757	1597	3288	32	341	0.2	-0.39	212	960	3663	1127	8360	1127	4168	3710	2536	0.36	0.92	5589	0.39	0.72
D_T5_1830_8d.lma	Dortmund	Solo	Female	251.1	3710	3710	3757	2160	3450	51	626	0.12	-0.26	208	817	3710	1362	7186	1362	3993	3757	1362	0.41	0.99	4133	0.46	0.81
P_498_1589_1.lma	Prag	Niko	Male	99.9	2865	2442	2912	2114	2749	73	460	0.03	-0.19	111	494	2865	5636	5777	2114	3143	2912	2865	0.03	0.81	2959	0.46	0.71
P_498_1659_6.lma	Prag	Niko	Male	118.8	3147	3429	3429	1926	2931	95	357	0.47	-0.2	332	885	3147	3429	6528	1926	3229	6481	3429	0.33	1	3569	0.32	0.56
P_498_1573_7.lma	Prag	Niko	Male	86.4	1080	845	1503	798	1026	51	366	0.81	0.08	111	438	564	564	5354	376	1305	1080	751	0.62	0.97	4697	0.44	0.55
P_498_1584_4.lma	Prag	Niko	Male	191.7	1597	1503	4086	1456	2305	165	1728	0.07	-0.32	454	1386	564	1033	5589	564	2906	1503	564	0.87	0	3006	0.37	0.54
P_498_1610_1.lma	Prag	Niko	Male	159.3	4509	1785	4509	1785	3019	75	554	0	-0.56	255	827	4556	470	6481	423	3551	2959	423	0.19	0.97	3241	0.35	0.56
P_498_1610_2.lma	Prag	Niko	Male	151.2	2865	3476	3569	2114	3003	121	892	0.84	0.02	254	914	2865	3476	4462	2114	3043	2959	3476	0.56	1	2348	0.27	0.45
P_498_1611_1.lma	Prag	Niko	Male	116.1	3757	2959	3757	1503	2791	185	1409	0	0.21	343	1169	705	1174	6153	376	2743	2959	376	0.4	0.98	3804	0.36	0.47
P_498_1648_2.lma	Prag	Niko	Male	170.1	2959	3382	3382	2865	3136	72	282	0.42	0.14	106	278	2959	470	6763	470	3555	6763	3147	0.48	0.95	3804	0.55	0.73
P_498_1649_1.lma	Prag	Niko	Male	132.3	2207	2865	4368	2160	2928	134	1306	0.06	-0.06	251	1386	2207	2865	4556	2160	3025	2865	2207	0.65	0	2348	0.49	0.68
P_498_1650_1.lma	Prag	Niko	Male	132.3	3898	3100	3898	3053	3303	36	132	0	-0.21	87	362	376	3100	3804	376	3231	3335	376	0.19	0	3429	0.5	0.74
P_498_1651_1.lma	Prag	Niko	Male	116.1	2207	1973	4274	1550	2868	127	1127	0.05	-0.29	207	1148	4650	5589	5589	470	3368	2865	5589	0.36	1	5119	0.58	0.71
P_498_1657_1.lma	Prag	Niko	Male	197.1	4133	1832	4133	1550	2970	117	611	0	-0.25	367	1072	4368	1832	6669	376	3725	2912	1832	0.08	1	4180	0.56	0.73
P_498_1593_6.lma	Prag	Niko	Male	121.5	3241	2865	4650	1597	2794	213	1014	0.02	-0.56	313	1300	6200	1127	7421	376	2819	2912	1127	0.18	0.11	5542	0.55	0.71
P_498_1643_1.lma	Prag	Niko	Male	140.4	1456	1738	3663	1362	2433	189	1068	0.06	-0.35	334	1470	658	751	5730	517	2754	4932	1409	0.18	0.96	4462	0.48	0.6
P_498_1647_1.lma	Prag	Niko	Male	83.7	3241	2536	3288	2442	2768	51	150	0.03	-0.51	100	233	3241	2536	5495	517	3079	2865	2536	0.23	1	3006	0.54	0.71
P_498_1659_5.lma	Prag	Niko	Male	56.7	1080	1268	1315	892	1194	65	225	0.25	0.23	85	323	611	5119	6998	611	3536	5213	1315	0.3	0.9	3992	0.44	0.64
P_498_1584_2.lma	Prag	Niko	Male	91.8	3147	2114	3147	2114	2589	56	301	0	-0.69	94	341	3147	2114	4744	2114	2707	2959	2114	0.12	1	2301	0.37	0.56
P_498_1584_3.lma	Prag	Niko	Male	91.8	2818	1503	2818	1503	2239	145	845	0	-0.72	219	910	2818	1503	5542	564	2551	2067	2771	0.7	0.21	4978	0.39	0.5
P_498_1584_5.lma	Prag	Niko	Male	78.3	3757	2865	3757	2583	3042	48	150	0	-0.63	160	369	3757	2865	5307	564	2816	2912	2865	0.43	1	2724	0.42	0.59
P_498_1610_4.lma	Prag	Niko	Male	145.8	3569	2114	3569	2067	2795	34	211	0	-0.49	85	297	3569	376	3569	376	2700	3053	3569	0.25	0.02	1738	0.41	0.53
P_498_1611_2.lma	Prag	Niko	Male	156.6	2724	2489	2865	1879	2618	43	407	0.07	-0.29	98	377	2724	1033	2865	658	2537	2865	1033	0.26	1	1644	0.36	0.46
P_498_1641_1.lma	Prag	Niko	Male	126.9	3523	2583	3616	2301	2799	47	305	0.02	-0.47	107	330	4415	423	4885	423	2837	2912	2536	0.35	0.93	2583	0.52	0.72
P_498_1660_1.lma	Prag	Niko	Male	156.6	2912	3804	4227	1456	2664	224	1306	0.61	0.26	597	1500	2912	1268	5636	1268	3319	2207	2912	0.47	0	3053	0.39	0.62
P_939_1572_3.lma	Prag	Indah	Female	232.2	2912	1738	3241	1127	2059	67	667	0.75	-0.25	235	1432	5119	845	10004	845	2984	4603	5119	0.12	0	5965	0.16	0.26
P_939_1553_1.lma	Prag	Indah	Female	305.1	1221	1315	3147	1127	1993	69	648	0.72	-0.19	250	1373	798	1315	6012	798	3101	4556	2536	0.19	0.05	4415	0.38	0.57
P_939_1553_3.lma	Prag	Indah	Female	294.3	2536	1268	3288	1268	2188	77	1268	0.82	-0.13	302	1312	5072	1268	7562	1033	3288	3523	1033	0.76	0.52	5072	0.29	0.49
P_939_1553_4.lma	Prag	Indah	Female	264.6	1127	1738	3288	1127	2144	199	1137	0.71	-0.14	342	1345	5307	564	8924	564	3419	4978	1409	0.09	0.86	6622	0.37	0.49
P_939_1560_1.lma	Prag	Indah	Female	199.8	2959	1738	2959	1033	2193	73	301	0	-0.43	177	551	2959	892	7984	751	3523	4932	7937	0.14	0.05	5307	0.29	0.48
P_939_1561_3.lma	Prag	Indah	Female	207.9	1832	1080	2630	1080	1871	52	686	0.04	-0.36	169	1274	3382	751	7327	751	3657	1221	3382	0.87	0	5965	0.15	0.42
P_939_1562_1.lma	Prag	Indah	Female	340.2	2865	1597	3288	1127	2057	121	1409	0.69	-0.21	278	1800	2865	1597	8031	376	3895	4603	2865	0.41	0	4603	0.21	0.36
P_939_1572_1.lma	Prag	Indah	Female	183.6	3147	1127	3147	1127	1840	27	611	0	-0.44	102	620	3147	1127	5401	892	2996	4509	1127	0.13	1	3616	0.26	0.48
P_939_1572_5.lma	Prag	Indah	Female	175.5	2912	1174	2912	1127	1937	38	319	0	-0.5	82	464	2912	1174	6012	986	3691	4650	1174	0.19	1	4415	0.15	0.27
P_939_1572_7.lma	Prag	Indah	Female	245.7	1456	1080	2536	939	1907	52	977	0.01	-0.35	184	1196	5025	705	7609	705	4033	4603	4556	0.17	0.83	4415	0.16	0.27
P_939_1573_2.lma	Prag	Indah	Female	199.8	2677	939	2677	939	1891	24	188	0	-0.41	128	347	2959	892	5918	892	3795	939	2959	0.99	0	3429	0.15	0.26
P_939_1573_3.lma	Prag	Indah	Female	245.7	2395	986	2395	986	1640	19	178	0	-0.32	61	189	4791	892	5777	892	3338	1174	892	0.74	1	2771	0.18	0.33
P_939_1573_9.lma	Prag	Indah	Female	218.7	2865	986	2865	986	2015	27	178	0	-0.47	133	504	5354	939	6763	892	4230	4650	939	0.3	1	4744	0.13	0.23
P_939_1585_2.lma	Prag	Indah	Female	321.3	1127	1127	3288	1127	1993	113	1090	0.75	-0.11	416	1455	5213	986	7515	517	3966	4744	986	0.38	1	3992	0.37	0.63
P_939_1585_3.lma	Prag	Indah	Female	361.8	1127	1080	3147	1080	1869	101	658	0.7	-0.13	360	1454	986	470	5354	423	3074	4509	3241	0.42	0.73	4368	0.35	0.59
P_939_1595_1.lma	Prag	Indah	Female	324	2207	1080	2395	1080	1953	48	507	0.07	-0.2	167	491	2207	1080	4791	470	3015	2207	3804	0.37	0.81	2583	0.54	0.69
P_939_1617_4.lma	Prag	Indah	Female	386.1	2677	1268	3147	1080	2032	62	939	0.74	-0.2	203	1444	7796	1268	7796	423	3408	1268	7796	0.85	0	5119	0.29	0.52
P_939_1617_5.lma	Prag	Indah	Female	415.8	1174	1127	3147	1080	2194	54	742	0.9	-0.06	226	1243	5072	1127	9065	986	3605	4697	1127	0.64	1	6763	0.36	0.52
P_939_1664_1.lma	Prag	Indah	Female	324	2489	1362	3147	1080	1750	69	864	0.55	-0.26	201	1477	4932	517	6434	376	2701	4368	564	0.18	0.97	4556	0.43	0.67
P_939_1684_15.lma	Prag	Indah	Female	442.8	2724	1315	3663	1268	2224	155	1428	0.89	-0.12	303	1847	2724	470	7890	470	3480	4978	1174	0.33	0.99	5542	0.19	0.31
P_939_1684_2.lma	Prag	Indah	Female	253.8	2677	1644	2959	1080	1921	66	1184	0.77	-0.29	178	1385	423	939	9018	423	4432	1644	939	0.72	1	6716	0.28	0.57
P_939_1572_6.lma	Prag	Indah	Female	170.1	1268	1644	2254	1080	1852	29	360	0.35	-0.23	263	923	1268	939	5918	939	3185	4274	4697	0.55	0.02	3663	0.18	0.28
P_939_1573_4.lma	Prag	Indah	Female	199.8	1785	1080	2207	986	1763	29	629	0.18	-0.36	209	1075	3523	892	4415	845	2960	939	3523	0.93	0	2771	0.2	0.34
P_939_1576_1.lma	Prag	Indah	Female	199.8	2020	1033	2254	986	1822	41	188	0.37	-0.36	187	458	6012	892	6106	751	2492	1221	6012	0.78	0	3757	0.12	0.21
P_939_1604_3.lma	Prag	Indah	Female	97.2	2254	1315	2489	1315	2231	63	488	0.03	-0.5	137	549	4838	4556	4978	2114	3678	2348	2489	0.49	0.03	2489	0.51	0.67
P_939_1574_1.lma	Prag	Indah	Female	156.6	2160	2442	2489	2020	2259	20	169	0.04	0.04	122	284	2160	4885	4885	2020	2301	2114	4885	0.39	1	2442	0.1	0.19
P_939_1588_1.lma	Prag	Indah	Female	116.1	2724	2254	2724	1973	2204	22	141	0	-0.13	147	393	2724	2254	2724	1973	2204	2067	2254	0.67	1	329	0.09	0.17
P_939_1573_8.lma	Prag	Indah	Female	151.2	986	986	2254	986	1753	74	620	0.13	-0.34	256	1200	3710	517	7609	517	3134	1174	3710	0.82	0.04	3616	0.2	0.41
P_939_1553_2.lma	Prag	Indah	Female	523.8	1174	1127	2395	939	1584	97	864	0.07	-0.03	332	715	1174	1127	4978	423	2369	1268	1080	0.9	0.99	3476	0.45	0.62
P_939_1573_1.lma	Prag	Indah	Female	351	2348	986	2348	986	1958	25	197	0	-0.08	263	730	4791	892	5918	892	4007	939	1879	0.98	0.82	3898	0.24	0.37
P_939_1578_1.lma	Prag	Indah	Female	469.8	2301	1033	2301	986	1776	28	188	0	-0.11	232	586	4697	1033	6106	986	2876	1315	6059	0.86	0.79	3147	0.13	0.2
P_939_1579_1.lma	Prag	Indah	Female	302.4	2630	1127	2630	1080	2134	31	263	0	-0.24	235	532	5307	939	5307	939	3935	1362	4885	0.89	0.61	2301	0.15	0.25
P_939_1617_1.lma	Prag	Indah	Female	421.2	1550	1315	3147	1080	2019	70	1099	0.81	-0.06	420	1263	658	1315	5354	658	3539	1315	658	0.87	0	4039	0.39	0.54
P_939_1617_3.lma	Prag	Indah	Female	623.7	1174	2160	2583	1174	2133	26	939	0	-0.06	238	1282	5260	751	7609	751	3210	1315	7609	0.95	0.07	5072	0.29	0.43
P_939_1664_2.lma	Prag	Indah	Female	391.5	1409	1268	3147	1174	1976	51	720	0.72	-0.18	197	1454	4978	423	4978	423	3245	4415	4932	0.51	0.01	3053	0.44	0.66
P_939_1668_3.lma	Prag	Indah	Female	464.4	2818	1362	3100	1080	2150	92	1249	0.98	-0.03	214	1086	470	4509	5354	470	4229	4462	470	0.18	0	4509	0.35	0.64
P_939_1669_4.lma	Prag	Indah	Female	567	2583	1362	3053	1362	2212	41	789	0.98	-0.04	205	1030	423	1362	7515	376	3789	4650	1738	0.27	0.58	5213	0.45	0.72
P_939_1684_11.lma	Prag	Indah	Female	426.6	2583	1127	2583	1033	2017	25	310	0	-0.09	247	716	2583	1127	8501	1033	3611	3757	4650	0.3	0.06	6012	0.25	0.34
P_939_1684_14.lma	Prag	Indah	Female	475.2	2818	1268	2818	1221	2225	17	197	0	-0.13	195	494	2818	1268	7327	1221	3941	5025	4321	0.2	0.91	4086	0.17	0.3
P_939_1684_17.lma	Prag	Indah	Female	583.2	2677	1268	2677	1268	2276	17	225	0	-0.05	179	763	2677	1268	10004	705	3215	5025	705	0.7	0.99	7609	0.24	0.41
P_939_1566_1.lma	Prag	Indah	Female	113.4	2583	2160	2583	1268	1827	97	517	0	-0.55	186	880	5166	2160	7937	517	3142	2254	1503	0.19	0.67	6341	0.43	0.58
P_939_1566_2.lma	Prag	Indah	Female	86.4	2301	1597	3523	1456	2414	214	751	0.1	-0.96	372	1395	3992	658	7656	658	3633	7515	1644	0.32	0.84	4368	0.47	0.66
P_939_1573_5.lma	Prag	Indah	Female	170.1	2254	1127	2254	892	1509	185	949	0	-0.41	301	886	2254	1127	5965	564	2728	4133	1456	0.11	0.98	3710	0.32	0.45
P_939_1573_6.lma	Prag	Indah	Female	121.5	2395	1127	2959	1033	1864	97	921	0.73	-0.66	136	1407	4791	845	5871	845	3892	4978	845	0.61	1	3851	0.19	0.32
P_939_1579_2.lma	Prag	Indah	Female	151.2	2583	1268	3241	1268	2123	131	1127	0.69	-0.46	217	1347	5166	1080	7280	1080	3464	4885	1550	0.29	0.84	2395	0.15	0.24
P_939_1580_1.lma	Prag	Indah	Female	175.5	2818	1174	2818	1127	2020	50	291	0	-0.48	144	508	4978	1174	6904	1127	3804	3757	4978	0.61	0	4556	0.16	0.26
P_939_1669_3.lma	Prag	Indah	Female	329.4	2630	1080	3100	1080	2169	63	864	0.82	-0.22	181	1320	2630	1080	7562	1080	3899	4650	3804	0.43	0.87	2818	0.48	0.75
P_939_1680_1.lma	Prag	Indah	Female	278.1	1691	1080	2630	1080	1955	44	611	0.01	-0.28	151	933	705	1080	5119	423	2871	2301	705	0.15	0	4415	0.49	0.73
P_939_1680_3.lma	Prag	Indah	Female	240.3	2348	1174	3429	1174	2025	135	1306	0.64	-0.25	295	1663	2348	1080	6341	986	2785	4415	1597	0.26	0.72	4180	0.5	0.71
P_939_1684_18.lma	Prag	Indah	Female	283.5	2630	1362	2630	1174	2086	18	113	0	-0.29	113	316	5213	705	5213	705	3169	5166	1550	0.06	0.87	2583	0.33	0.53
P_939_1684_19.lma	Prag	Indah	Female	251.1	2536	1315	3804	1315	2293	156	1268	0.82	-0.07	204	1626	2536	1315	4932	376	2948	4932	517	0.16	0.93	2583	0.46	0.61
P_939_1584_6.lma	Prag	Indah	Female	126.9	2771	2348	2771	1456	2399	58	498	0	-0.34	105	659	2771	4462	8031	892	3411	2677	4462	0.15	1	4415	0.3	0.46
P_939_1616_1.lma	Prag	Indah	Female	151.2	2630	1268	3663	1268	2354	123	751	0.78	-0.06	376	1352	7843	1127	7843	1127	4883	4885	7843	0.33	0	4368	0.22	0.38
Z_969_2160_6.lma	Zlin	Nadira	Female	199.8	2348	2348	2583	1503	2283	66	611	0.44	-0.1	185	626	4697	2348	4697	1503	2694	2348	2348	0.19	1	2301	0.57	0.86
Z_969_1979_3.lma	Zlin	Nadira	Female	648	2959	2348	3006	1456	2256	43	686	0.01	-0.03	298	808	2959	2348	3006	1456	2256	2348	3006	0.77	0.1	845	0.23	0.4
Z_969_1998_3.lma	Zlin	Nadira	Female	648	2254	2207	2489	1409	2011	48	498	0.08	-0.02	237	608	2254	2207	4932	1409	2044	2160	1879	0.19	1	2677	0.36	0.56
Z_969_1968_5.lma	Zlin	Nadira	Female	143.1	2442	1973	2630	1691	2290	56	197	0.04	-0.36	85	292	2442	1973	2630	1691	2290	2020	2442	0.75	0	423	0.48	0.75
Z_969_1968_9.lma	Zlin	Nadira	Female	170.1	2536	2067	2536	1832	2265	32	216	0	-0.12	52	277	2536	2067	4885	1832	2524	2254	2536	0.61	0	2442	0.61	0.86
Z_969_1979_4.lma	Zlin	Nadira	Female	199.8	2912	2207	2912	1832	2410	57	244	0	-0.29	90	312	2912	2207	5636	1832	2484	2395	2912	0.45	0	2865	0.26	0.53
Z_969_1981_3.lma	Zlin	Nadira	Female	207.9	2348	2254	2771	1550	2345	71	592	0.36	-0.11	154	630	2348	2254	2771	1550	2345	2583	2348	0.29	0.14	986	0.38	0.69
Z_969_1981_5.lma	Zlin	Nadira	Female	164.7	2348	1503	2442	1409	2061	52	592	0.42	-0.32	107	517	2348	4415	4697	1456	3416	4556	2348	0.28	0	2912	0.59	0.79
Z_969_1983_3.lma	Zlin	Nadira	Female	226.8	2395	1503	2442	1503	2181	36	250	0.24	-0.16	97	380	2395	1503	4744	1503	2209	2395	1879	0.3	0.93	2348	0.12	0.22
Z_969_1983_4.lma	Zlin	Nadira	Female	237.6	2301	2207	2724	1315	2308	69	714	0.17	-0.08	158	845	2301	2207	2724	1315	2308	2207	2724	0.54	0.17	892	0.24	0.41
Z_969_1990_1.lma	Zlin	Nadira	Female	232.2	939	1033	2442	939	2150	52	986	0.01	-0.22	205	1654	939	1033	4744	939	2970	4697	2442	0.64	0.01	2442	0.52	0.8
Z_969_1996_2.lma	Zlin	Nadira	Female	189	2348	1785	2348	1456	2103	43	216	0	-0.22	95	328	2348	1785	4556	1456	3896	4556	2348	0.39	0	2442	0.56	0.8
Z_969_1998_8.lma	Zlin	Nadira	Female	180.9	2395	1597	2442	1362	2110	24	150	0.11	-0.34	136	288	2395	1597	4650	1362	2313	1597	2348	0.98	0.35	2301	0.39	0.64
Z_969_2010_3.lma	Zlin	Nadira	Female	218.7	2254	1550	2442	1362	1962	44	207	0.22	-0.31	141	343	2254	1550	4509	1362	1989	1550	4509	0.74	0.02	2254	0.5	0.78
Z_969_2010_4.lma	Zlin	Nadira	Female	221.4	986	1503	2207	986	1986	65	834	0.05	-0.08	153	1147	4133	1503	4415	423	2401	1550	4133	0.98	0	3992	0.53	0.83
Z_969_2011_3.lma	Zlin	Nadira	Female	267.3	2395	1409	2536	1221	2141	94	874	0.2	-0.14	223	1233	423	1409	4650	423	2226	1926	423	0.71	0	4180	0.64	0.85
Z_969_2135_5.lma	Zlin	Nadira	Female	226.8	2160	1738	2536	1362	2049	31	329	0.27	-0.17	139	458	2160	1738	2536	1362	2049	1785	2536	0.72	0.27	423	0.22	0.39
Z_969_2137_13.lma	Zlin	Nadira	Female	213.3	2348	2301	2395	2114	2287	28	103	0.01	-0.06	45	155	2348	2301	4744	2114	2375	2254	2301	0.45	1	2348	0.2	0.41
Z_969_2137_3.lma	Zlin	Nadira	Female	175.5	2301	2114	2301	1550	2186	56	338	0	-0.11	88	515	2301	2114	4556	1550	2289	2301	4509	0.05	0.27	2254	0.2	0.32
Z_969_2137_4.lma	Zlin	Nadira	Female	194.4	2301	2301	2395	1926	2299	33	235	0.21	-0.04	55	340	2301	2301	2395	1926	2299	2301	2254	0.51	0.96	423	0.22	0.4
Z_969_2148_3.lma	Zlin	Nadira	Female	232.2	1409	2207	2348	939	2127	95	592	0.13	-0.08	193	1055	470	2207	4697	423	2466	2160	470	0.59	0	4180	0.75	0.86
Z_969_2149_9.lma	Zlin	Nadira	Female	164.7	2348	2207	2959	1268	2192	85	723	0.82	-0.14	139	890	4744	2207	4744	1268	2349	2207	2254	0.52	0.93	2395	0.4	0.73
Z_969_2150_3.lma	Zlin	Nadira	Female	218.7	2348	2114	3335	1221	2219	85	1127	0.02	-0.19	200	1351	10474	1033	10474	892	2439	2395	892	0.51	0.01	9581	0.7	0.87
Z_969_2150_6.lma	Zlin	Nadira	Female	202.5	2348	2771	2912	1362	2215	58	554	0.95	-0.1	148	848	2348	1033	4744	1033	2368	2160	2348	0.64	0	2395	0.65	0.86
Z_969_2151_1.lma	Zlin	Nadira	Female	237.6	2912	1832	2912	1785	2239	49	407	0	-0.1	76	469	11930	1832	21464	423	3012	2395	11930	0.36	0	9910	0.72	0.88
Z_969_2151_4.lma	Zlin	Nadira	Female	237.6	2395	1597	2395	1456	2164	52	404	0	-0.14	131	449	2395	1597	6669	1456	2491	2254	1597	0.31	1	4462	0.75	0.87
Z_969_2151_5.lma	Zlin	Nadira	Female	232.2	2348	1315	2489	939	2146	120	751	0.49	-0.21	216	850	4697	1315	6998	939	2282	2348	4697	0.28	0	4650	0.71	0.86
Z_969_2155_1.lma	Zlin	Nadira	Female	243	2395	1926	2395	1315	2078	49	592	0	-0.2	154	633	2395	1926	4744	564	2243	1973	2254	0.54	0.97	2395	0.43	0.73
Z_969_2155_2.lma	Zlin	Nadira	Female	180.9	2301	1221	2301	1221	2016	16	75	0	-0.3	142	348	2301	1221	2301	1221	2016	2114	1597	0.65	0.82	235	0.28	0.51
Z_969_2155_6.lma	Zlin	Nadira	Female	226.8	2442	1879	2442	986	2034	53	404	0	-0.3	153	547	2442	1879	2442	892	2017	1879	939	0.66	0.95	892	0.41	0.66
Z_969_2156_4.lma	Zlin	Nadira	Female	232.2	2348	1221	2348	1221	1935	19	85	0	-0.3	124	343	2348	3523	6481	1221	2111	2301	3523	0.09	1	4321	0.31	0.56
Z_969_2159_1.lma	Zlin	Nadira	Female	183.6	2395	2207	2395	1315	2091	40	595	0	-0.27	159	537	4791	2207	4791	1315	2236	2254	2207	0.46	1	2395	0.28	0.61
Z_969_2159_2.lma	Zlin	Nadira	Female	175.5	2348	1409	2348	1409	2108	31	357	0	-0.24	112	386	4744	1409	4744	1409	2252	2207	1597	0.55	0.91	2348	0.27	0.46
Z_969_2159_3.lma	Zlin	Nadira	Female	178.2	2348	1409	2348	1409	2069	14	66	0	-0.26	90	258	4744	1409	6528	1409	2535	2207	1738	0.48	0.89	4368	0.27	0.5
Z_969_2159_4.lma	Zlin	Nadira	Female	191.7	2348	1362	2348	1362	2071	9	38	0	-0.27	116	283	4697	1362	4697	1362	2104	2207	1879	0.54	0.8	2348	0.2	0.38
Z_969_2162_8.lma	Zlin	Nadira	Female	218.7	2301	1174	2301	939	1846	22	272	0	-0.38	154	314	2301	751	4321	751	1858	2207	751	0.3	1	2160	0.42	0.77
Z_969_2165_1.lma	Zlin	Nadira	Female	251.1	2348	892	2536	892	1911	75	845	0.17	-0.39	237	1016	4697	892	5119	564	2383	2207	1879	0.47	0.91	2583	0.35	0.61
Z_969_2173_2.lma	Zlin	Nadira	Female	240.3	1409	1456	2489	1174	2011	48	564	0.03	-0.26	144	1174	1409	1456	6575	705	2175	2301	1409	0.28	0	4368	0.64	0.89
Z_969_1995_2.lma	Zlin	Nadira	Female	194.4	2301	2160	2630	1832	2228	49	219	0.2	-0.12	99	332	2301	2160	4650	1832	2293	2160	2254	0.73	0.42	2395	0.22	0.36
Z_969_2149_1.lma	Zlin	Nadira	Female	305.1	1785	2114	2536	1033	2112	57	658	0.29	-0.13	241	1403	16908	423	16908	376	2449	2301	14982	0.54	0.01	10474	0.58	0.86
Z_969_2149_8.lma	Zlin	Nadira	Female	251.1	3241	1409	3241	1127	2065	90	761	0	-0.25	303	1184	3241	1409	3241	892	1942	2301	2442	0.11	0.02	798	0.59	0.86
Z_969_2155_7.lma	Zlin	Nadira	Female	75.6	705	1221	1409	517	1045	94	438	0.04	-0.32	127	544	1832	1221	1832	517	1100	986	1832	0.56	0	705	0.59	0.82
Z_969_2173_1.lma	Zlin	Nadira	Female	197.1	2442	1315	2442	1315	1976	23	141	0	-0.33	80	214	2442	1315	5119	1315	2411	2160	1691	0.38	0.92	3429	0.26	0.48
Z_969_2149_7.lma	Zlin	Nadira	Female	264.6	2395	1174	2489	1174	2086	12	47	0.22	-0.26	172	334	2395	1174	4603	1174	2133	2160	1174	0.6	1	2301	0.41	0.83
Z_969_2153_1.lma	Zlin	Nadira	Female	175.5	2395	1362	2395	1268	1994	51	338	0	-0.42	140	374	2395	1362	4415	1268	2258	2395	1409	0.27	0.95	2207	0.27	0.5
Z_969_2162_10.lma	Zlin	Nadira	Female	156.6	2301	1409	2395	1409	2049	25	169	0.07	-0.32	75	239	2301	1409	4321	1409	2263	2348	1503	0.12	0.93	2160	0.38	0.7
Z_969_2162_4.lma	Zlin	Nadira	Female	213.3	2348	1174	2442	1174	2096	28	204	0.42	-0.22	155	521	2348	1174	4650	1174	2182	1879	1174	0.74	1	2301	0.29	0.54
Z_969_2164_1.lma	Zlin	Nadira	Female	245.7	2301	2114	2442	892	1915	63	658	0.17	-0.3	136	835	2301	2114	2630	564	2000	1879	564	0.57	0.98	1221	0.36	0.64
Z_969_2170_1.lma	Zlin	Nadira	Female	151.2	2301	1174	2771	986	1862	65	1052	0.71	-0.64	171	1253	2301	939	2771	705	1832	2020	939	0.49	1	1362	0.29	0.5
Z_969_2172_6.lma	Zlin	Nadira	Female	207.9	2348	1127	2536	986	2115	31	150	0.21	-0.31	156	624	2348	423	5589	423	2207	2254	939	0.5	0.99	3757	0.37	0.68
Z_969_2173_3.lma	Zlin	Nadira	Female	210.6	2254	1174	2536	1174	2010	49	423	0.36	-0.34	171	474	2254	939	2536	939	2007	2207	939	0.49	1	751	0.33	0.57
Z_969_2149_3.lma	Zlin	Nadira	Female	307.8	2348	2395	2865	1174	2162	49	695	0.81	-0.1	240	860	4650	2395	4697	751	2245	2395	2395	0.31	0.97	2348	0.44	0.8
Z_969_2149_4.lma	Zlin	Nadira	Female	313.2	2301	1973	2395	1127	2060	50	573	0.06	-0.2	212	721	4650	376	7045	376	2467	2395	4650	0.37	0	4697	0.45	0.83
Z_969_2149_5.lma	Zlin	Nadira	Female	407.7	2583	1832	2818	1080	2012	97	939	0.73	-0.13	257	1322	376	1832	4791	376	1787	1832	1221	0.52	0.01	3335	0.6	0.87
Z_969_2149_6.lma	Zlin	Nadira	Female	256.5	2395	1785	2489	1409	2202	20	197	0.3	-0.18	161	488	2395	1785	3382	1409	2217	2348	1785	0.22	1	1644	0.58	0.88
Z_969_2130_1.lma	Zlin	Nadira	Female	91.8	1268	1268	1362	1268	1286	9	38	0.76	0	23	75	1268	1268	1362	1268	1286	1268	1268	0.48	0.03	47	0.1	0.19
Z_969_2133_1.lma	Zlin	Nadira	Female	248.4	2348	1503	2348	1080	1979	77	968	0	-0.27	222	968	4603	1503	4603	517	2230	2254	4603	0.19	0	2301	0.55	0.83
Z_969_2135_4.lma	Zlin	Nadira	Female	237.6	2724	1315	2771	1315	2177	35	432	0.01	-0.45	250	610	2724	1315	2771	1315	2177	1409	2630	0.75	0.59	1033	0.44	0.73
Z_969_2135_7.lma	Zlin	Nadira	Female	307.8	2301	1362	2301	1174	1758	32	319	0	-0.26	204	451	2301	1362	2583	1174	1866	1268	2489	0.61	0.45	939	0.28	0.54
Z_969_2136_1.lma	Zlin	Nadira	Female	151.2	1315	1221	1315	1221	1229	5	31	0	-0.01	12	77	1315	1221	1315	1221	1229	1221	1221	0.24	0.84	47	0.15	0.28
Z_969_2137_1.lma	Zlin	Nadira	Female	251.1	2442	1221	2677	1080	1798	58	423	0.33	-0.38	214	832	2442	1221	2677	1080	1798	1268	2630	0.6	0.49	892	0.27	0.49
Z_969_2137_6.lma	Zlin	Nadira	Female	159.3	1315	1456	1644	1268	1472	26	235	0.03	-0.03	37	236	470	1456	1644	470	1458	1456	1550	0.43	0.1	845	0.53	0.79
Z_969_2137_8.lma	Zlin	Nadira	Female	232.2	2254	1127	2254	798	1630	156	874	0	-0.36	231	993	2254	1127	2724	798	1999	939	2254	0.88	0.04	1832	0.57	0.8
Z_969_2137_9.lma	Zlin	Nadira	Female	137.7	1315	1174	1362	1174	1221	20	85	0.04	-0.02	37	157	1315	1174	1362	1174	1221	1174	1174	0.22	1	141	0.18	0.37
Z_969_2150_1.lma	Zlin	Nadira	Female	267.3	2348	1315	2348	1033	1736	39	977	0	-0.32	206	941	2348	1315	2677	1033	1752	1315	2254	0.55	0.44	658	0.75	0.86
Z_969_2150_2.lma	Zlin	Nadira	Female	305.1	2160	1409	2677	1080	1978	64	488	0.01	-0.25	227	807	11037	470	11037	470	2268	2301	11037	0.2	0	8360	0.77	0.88
Z_969_2151_2.lma	Zlin	Nadira	Female	310.5	2348	1691	2583	1362	2028	39	310	0.2	-0.17	143	508	4744	1691	4744	1362	2187	1738	2207	0.58	0.46	2395	0.77	0.86
Z_969_2151_3.lma	Zlin	Nadira	Female	342.9	2348	1362	2630	1221	1878	37	301	0.23	-0.25	222	740	2348	15170	15170	1221	2096	2348	2395	0.18	0.48	13808	0.78	0.88
Z_969_2151_6.lma	Zlin	Nadira	Female	226.8	1644	1785	2583	1362	2168	96	479	0.33	-0.14	228	828	4509	1785	4556	1362	2331	2583	4556	0.35	0.71	2254	0.78	0.86
Z_969_2154_1.lma	Zlin	Nadira	Female	278.1	1174	1174	1832	658	1247	92	817	0.34	0.03	234	636	2395	1174	2677	517	1471	1174	1221	0.59	0.91	1550	0.66	0.87
Z_969_2155_3.lma	Zlin	Nadira	Female	186.3	2395	1362	2442	1315	1726	26	366	0.07	-0.44	230	488	2395	1362	2442	423	1697	1315	2348	0.69	0.31	1973	0.47	0.82
Z_969_2155_4.lma	Zlin	Nadira	Female	253.8	2348	1362	2818	1127	1748	69	789	0.23	-0.35	223	729	2348	1362	2818	423	1690	2254	1409	0.12	0.56	1127	0.68	0.83
Z_969_2155_5.lma	Zlin	Nadira	Female	237.6	2301	1268	2348	986	1565	29	395	0.06	-0.34	223	496	2301	1268	4650	986	1695	1268	4603	0.6	0.23	3288	0.42	0.81
Z_969_2156_1.lma	Zlin	Nadira	Female	216	2301	1315	2583	1033	1572	86	874	0.66	-0.26	286	1175	2301	1315	2724	1033	1593	1315	2301	0.57	0.32	1644	0.73	0.88
Z_969_2156_2.lma	Zlin	Nadira	Female	253.8	2301	1315	2442	1221	1636	26	413	0.16	-0.32	245	497	2301	1315	4697	1221	1685	1268	4697	0.51	0.31	3288	0.62	0.84
Z_969_2156_3.lma	Zlin	Nadira	Female	253.8	2442	1221	2724	1033	1793	44	413	0.18	-0.38	173	598	2442	1221	4838	564	1754	1174	564	0.75	0.02	4274	0.74	0.87
Z_969_2160_1.lma	Zlin	Nadira	Female	180.9	2489	1315	2536	1033	1770	119	620	0.06	-0.4	225	1021	2489	1315	4321	1033	1809	1315	1033	0.86	0.32	2724	0.63	0.83
Z_969_2160_2.lma	Zlin	Nadira	Female	253.8	2395	939	2583	939	2025	73	488	0.32	-0.32	261	889	4791	939	4791	939	2170	2254	2959	0.17	0.57	2395	0.64	0.81
Z_969_2160_3.lma	Zlin	Nadira	Female	270	2395	1033	2583	1033	1679	64	526	0.31	-0.32	149	642	2395	986	4978	986	1833	1033	2160	0.94	0.4	3663	0.56	0.8
Z_969_2160_4.lma	Zlin	Nadira	Female	237.6	2348	1268	2630	1268	2079	29	385	0.31	-0.33	241	606	2348	1221	2630	892	2059	2301	1785	0.13	0.63	939	0.43	0.75
Z_969_2160_5.lma	Zlin	Nadira	Female	194.4	2442	1362	2677	1268	1821	90	808	0.61	-0.43	206	1029	2442	1362	2677	1268	1821	1315	1456	0.76	0.41	1362	0.48	0.83
Z_969_2161_1.lma	Zlin	Nadira	Female	178.2	2348	1268	2912	1268	1897	78	470	0.22	-0.55	280	873	2348	1268	5824	1268	2375	1315	2912	0.66	0.42	3523	0.36	0.8
Z_969_2161_2.lma	Zlin	Nadira	Female	89.1	1315	1268	1362	1268	1289	11	38	0.03	-0.03	19	50	1315	1268	1362	1268	1289	1268	1268	0.53	0.97	47	0.34	0.63
Z_969_2161_3.lma	Zlin	Nadira	Female	207.9	2348	1268	2630	1127	1675	89	526	0.47	-0.35	291	988	2348	1268	2630	470	1608	1268	2348	0.72	0.33	1315	0.49	0.79
Z_969_2161_4.lma	Zlin	Nadira	Female	213.3	2348	1268	2677	1221	1710	65	554	0.53	-0.39	257	1004	2348	1268	4697	1221	1769	1268	2395	0.79	0.26	2348	0.52	0.8
Z_969_2162_1.lma	Zlin	Nadira	Female	191.7	2395	1268	2395	1221	1827	28	385	0	-0.46	197	518	2395	1268	2395	1221	1827	1268	2301	0.83	0.51	939	0.77	0.89
Z_969_2162_2.lma	Zlin	Nadira	Female	175.5	2536	1268	2583	986	1625	44	827	0.05	-0.48	273	977	2536	1268	2677	470	1611	1268	470	0.78	0.28	2160	0.44	0.82
Z_969_2162_3.lma	Zlin	Nadira	Female	232.2	2395	1221	2677	1174	2010	60	658	0.32	-0.35	251	734	4885	1221	5354	1174	2236	1785	1268	0.72	0.51	2724	0.42	0.74
Z_969_2162_6.lma	Zlin	Nadira	Female	264.6	2489	1268	2771	1080	1649	74	751	0.15	-0.25	361	875	2489	423	2771	423	1617	1315	2395	0.51	0.32	1644	0.48	0.74
Z_969_2162_7.lma	Zlin	Nadira	Female	207.9	2301	1268	2771	1080	1732	72	958	0.33	-0.39	233	821	2301	1268	2771	1080	1732	1268	2301	0.7	0.36	1221	0.47	0.83
Z_969_2162_9.lma	Zlin	Nadira	Female	297	2348	1080	2677	1080	1929	58	338	0.28	-0.2	158	525	2348	564	4603	517	1890	1785	892	0.61	0.91	2301	0.55	0.84
Z_969_2163_1.lma	Zlin	Nadira	Female	186.3	1409	1315	1973	798	1387	42	348	0.54	-0.01	158	588	1409	1315	1973	470	1375	1315	470	0.22	0.91	1080	0.47	0.74
Z_969_2166_1.lma	Zlin	Nadira	Female	94.5	1315	1362	1738	1315	1388	35	188	0.85	0.13	87	276	1315	1362	1738	1315	1388	1315	1315	0.32	0	376	0.39	0.62
Z_969_2168_1.lma	Zlin	Nadira	Female	118.8	1409	1315	1409	1268	1334	14	47	0	-0.05	24	62	1409	1973	2020	1268	1366	1362	1362	0.19	0.86	705	0.26	0.6
Z_969_2170_2.lma	Zlin	Nadira	Female	237.6	2301	892	2395	892	1919	65	695	0.47	-0.4	290	852	4603	611	4697	376	2025	2348	2348	0.24	0.46	2348	0.48	0.79
Z_969_2171_1.lma	Zlin	Nadira	Female	240.3	2348	1221	2348	1174	1584	26	385	0	-0.33	220	487	2348	1221	4556	423	1617	1221	2348	0.7	0.3	2301	0.72	0.87
N_1003_767_1.lma	Nuremberg	Manado	Male	99.9	2348	2207	2348	2207	2234	14	75	0	0	32	116	2348	2207	2348	2207	2234	2207	2348	0.44	0	94	0.3	0.51
N_1003_789_1.lma	Nuremberg	Manado	Male	81	2395	2207	2395	2114	2229	28	172	0	-0.01	43	161	2395	2207	2395	2114	2229	2254	2395	0.34	0	235	0.11	0.17
N_1003_800_1.lma	Nuremberg	Manado	Male	116.1	2254	2207	2301	2160	2223	9	47	0.07	-0.02	22	88	2254	2207	2301	2160	2223	2207	2254	0.43	0	94	0.17	0.38
N_1003_808_2.lma	Nuremberg	Manado	Male	113.4	2395	2114	2395	2114	2209	22	66	0	-0.1	34	111	2395	2114	2395	2114	2209	2207	2395	0.37	0	94	0.29	0.49
N_1003_810_1.lma	Nuremberg	Manado	Male	108	2348	2160	2348	2114	2184	12	47	0	-0.09	27	86	2348	2160	2348	2114	2184	2160	2348	0.46	0	94	0.45	0.72
N_1003_846_1.lma	Nuremberg	Manado	Male	70.2	2160	2020	2207	2020	2063	14	47	0.04	-0.13	22	77	2160	2020	2207	2020	2063	2067	2020	0.36	0.92	47	0.37	0.59
N_1003_848_1.lma	Nuremberg	Manado	Male	132.3	2301	2114	2301	2067	2165	16	113	0	-0.09	29	100	2301	2114	2301	2067	2165	2254	2301	0.25	0	188	0.22	0.4
N_1003_863_1.lma	Nuremberg	Manado	Male	124.2	2442	2160	2489	2114	2236	18	56	0.02	-0.13	45	132	2442	2160	2489	2114	2236	2254	2442	0.29	0	141	0.23	0.43
N_1003_874_1.lma	Nuremberg	Manado	Male	113.4	3100	2160	3147	2114	2306	33	310	0.07	-0.39	208	547	3100	2160	4415	2114	2394	2207	3100	0.29	0	2020	0.27	0.49
N_1003_886_1.lma	Nuremberg	Manado	Male	110.7	2254	2160	2395	2160	2194	12	141	0.98	0.02	45	188	2254	2160	2395	2160	2194	2160	2254	0.52	0	235	0.12	0.26
N_1003_914_1.lma	Nuremberg	Manado	Male	121.5	2348	2207	2395	2114	2208	23	113	0.02	-0.04	40	152	2348	2207	2395	2114	2208	2207	2160	0.43	0.93	188	0.22	0.41
N_1003_923_1.lma	Nuremberg	Manado	Male	83.7	2583	2207	2583	2207	2262	16	94	0	-0.13	41	231	2583	2207	2583	2207	2262	2254	2583	0.27	0	188	0.13	0.28
N_1003_845_1.lma	Nuremberg	Manado	Male	108	3523	3241	4039	3006	3501	83	413	0.33	-0.32	173	534	3523	892	4039	892	3379	3382	892	0.56	0.97	2395	0.6	0.84
N_1003_786_11.lma	Nuremberg	Manado	Male	205.2	2442	1221	2677	1174	2173	40	366	0.65	-0.44	303	786	2442	423	2677	423	2142	2395	423	0.49	1	939	0.42	0.78
N_1003_806_1.lma	Nuremberg	Manado	Male	151.2	3710	3241	4274	2818	3588	76	395	0.33	-0.37	238	866	3710	705	4274	376	3491	3757	376	0.53	0.96	2818	0.58	0.82
N_1003_815_3.lma	Nuremberg	Manado	Male	432	2160	1221	3147	1221	2018	37	564	0.38	-0.15	87	998	2160	798	4885	517	1977	2301	1738	0.18	0.76	2536	0.4	0.58
N_1003_815_4.lma	Nuremberg	Manado	Male	213.3	2630	1315	3100	1221	2464	58	451	0.78	-0.19	239	919	2630	939	3100	564	2399	2630	2677	0.22	0.86	2536	0.36	0.56
N_1003_827_1.lma	Nuremberg	Manado	Male	145.8	2818	1221	2959	1221	2077	163	592	0.47	-0.41	382	853	2818	423	2959	423	1748	564	2771	0.79	0.02	1033	0.25	0.39
N_1003_831_1.lma	Nuremberg	Manado	Male	172.8	2677	2301	3945	2160	2745	157	1043	0.19	0.03	197	1226	2677	3992	5307	2160	3175	2771	2160	0.35	0.97	3100	0.45	0.63
N_1003_884_1.lma	Nuremberg	Manado	Male	159.3	2536	2207	3288	1644	2697	88	742	0.53	-0.06	202	985	2536	1080	3288	1080	2573	2724	2536	0.28	0	2067	0.61	0.84
N_1003_892_47.lma	Nuremberg	Manado	Male	132.3	2724	2959	2959	1926	2393	75	505	0.98	-0.29	127	890	5401	1127	5401	705	2317	2114	5401	0.75	0	1879	0.43	0.59
N_1004_755_40.lma	Nuremberg	Pinola	Female	256.5	2818	1409	2818	1409	2376	19	291	0	-0.25	101	413	5589	1409	5589	845	2601	2067	1409	0.76	1	2818	0.33	0.6
N_1004_785_3b.lma	Nuremberg	Pinola	Female	162	2724	1503	2724	1503	2294	27	160	0	-0.36	117	288	2724	1503	2724	1503	2294	2489	2020	0.22	0.8	376	0.22	0.37
N_1004_771_14.lma	Nuremberg	Pinola	Female	207.9	2114	2160	2724	1691	2203	60	493	0.83	0.04	71	579	2114	2160	4368	2114	2687	4368	3382	0.29	0.97	2207	0.39	0.63
N_1004_771_21.lma	Nuremberg	Pinola	Female	183.6	2536	2207	2724	2160	2443	16	113	0.06	-0.12	44	128	2536	2207	5119	2160	2481	2207	2536	0.91	0.03	2583	0.3	0.52
N_1004_772_14.lma	Nuremberg	Pinola	Female	216	2818	2348	2818	2114	2436	33	207	0	-0.13	52	190	939	2348	5119	939	2445	2395	939	0.57	0	2583	0.59	0.79
N_1004_773_17.lma	Nuremberg	Pinola	Female	178.2	2442	1315	2442	1268	2205	48	798	0	-0.13	62	976	2442	1315	4650	1127	3044	4509	2114	0.43	0.98	2301	0.36	0.63
N_1004_773_21.lma	Nuremberg	Pinola	Female	172.8	2771	2114	2771	1973	2401	31	178	0	-0.28	112	344	2771	2114	5448	1973	2528	2207	2114	0.59	1	2724	0.4	0.62
N_1004_773_32.lma	Nuremberg	Pinola	Female	199.8	2348	1644	2489	1644	2260	27	376	0.03	-0.1	48	448	423	1644	4932	423	2468	2254	4838	0.42	0.01	4415	0.66	0.84
N_1004_773_34.lma	Nuremberg	Pinola	Female	216	2114	1268	2536	1268	2224	72	599	0.04	-0.2	101	582	2114	517	2536	517	2168	2254	517	0.43	1	1973	0.65	0.86
N_1004_784_18.lma	Nuremberg	Pinola	Female	105.3	2395	2536	2630	2395	2525	18	129	0.58	0.07	29	189	2395	376	2630	376	2366	2583	2395	0.71	0	2114	0.62	0.81
N_1004_892_44.lma	Nuremberg	Pinola	Female	207.9	2489	2160	2677	2114	2472	15	85	0.46	-0.12	81	199	5025	2160	5166	2114	3103	5119	2160	0.46	1	2630	0.41	0.62
N_1004_755_12.lma	Nuremberg	Pinola	Female	216	2583	1268	3194	1221	2098	120	1071	0.73	-0.32	168	1370	2583	1080	5072	1080	2128	2114	3194	0.51	0.73	2536	0.22	0.37
N_1004_755_18.lma	Nuremberg	Pinola	Female	297	2583	1362	2677	1315	2092	50	470	0.12	-0.29	126	650	939	517	5354	423	2180	2067	517	0.54	1	4086	0.37	0.63
N_1004_755_25.lma	Nuremberg	Pinola	Female	288.9	2489	2207	3710	1268	2129	84	977	0.67	-0.21	183	1761	4978	1127	5025	1127	2698	2160	2067	0.49	0.72	2489	0.19	0.4
N_1004_755_27.lma	Nuremberg	Pinola	Female	337.5	2489	1550	2677	1174	1952	75	714	0.85	-0.16	258	1048	2489	705	7656	705	1913	2160	2067	0.27	0.44	5213	0.24	0.45
N_1004_755_35.lma	Nuremberg	Pinola	Female	245.7	2630	1221	3429	1174	2221	87	676	0.7	-0.31	257	1488	2630	470	4603	470	2302	2489	470	0.31	1	2301	0.24	0.48
N_1004_755_56.lma	Nuremberg	Pinola	Female	199.8	2677	2114	2771	1926	2407	16	103	0.08	-0.26	58	185	2677	2114	5542	1926	2841	2301	2677	0.66	0.25	2865	0.18	0.29
N_1004_771_13.lma	Nuremberg	Pinola	Female	313.2	2348	1033	2677	939	1905	71	827	0.8	-0.21	185	1129	2348	658	5777	611	2377	4321	1174	0.12	0.85	4274	0.33	0.57
N_1004_771_23.lma	Nuremberg	Pinola	Female	189	2583	2160	2583	1973	2319	15	132	0	-0.16	32	122	5213	2160	6669	2020	3008	2348	2160	0.43	1	4462	0.25	0.44
N_1004_773_24.lma	Nuremberg	Pinola	Female	143.1	2489	2254	2536	2067	2369	12	110	0.08	-0.2	42	130	2489	2254	2536	2067	2369	2301	2254	0.63	1	141	0.21	0.35
N_1004_774_10.lma	Nuremberg	Pinola	Female	313.2	2301	1127	2959	1127	1865	113	1428	0.76	-0.22	190	1400	2301	564	2348	564	1665	2254	658	0.28	0.96	282	0.41	0.67
N_1004_774_12.lma	Nuremberg	Pinola	Female	275.4	2067	1080	2207	939	1841	28	169	0.05	-0.27	147	440	2067	798	3006	798	1868	2207	2067	0.29	0	2160	0.47	0.74
N_1004_784_17.lma	Nuremberg	Pinola	Female	302.4	2630	1315	3100	1315	2315	56	528	0.02	-0.3	133	563	2630	564	3100	564	2278	2207	1456	0.56	0.93	1785	0.57	0.78
N_1004_784_22.lma	Nuremberg	Pinola	Female	326.7	3053	1174	3100	1174	2138	30	132	0.08	-0.4	98	315	3053	986	3100	986	2129	2583	1174	0.37	0.89	282	0.63	0.88
N_1004_784_9.lma	Nuremberg	Pinola	Female	256.5	2583	1174	2771	1174	2406	28	250	0.17	-0.24	143	693	376	1174	5401	376	2412	2114	376	0.78	0	2677	0.77	0.96
N_1004_786_4.lma	Nuremberg	Pinola	Female	345.6	1174	1127	3288	1127	2043	105	939	0.67	-0.15	299	1442	423	1080	5730	423	2459	2442	2207	0.2	0.01	3851	0.55	0.82
N_1004_786_5.lma	Nuremberg	Pinola	Female	213.3	2912	2207	2912	1691	2358	34	310	0	-0.29	100	376	2912	2207	5401	1691	3040	2160	2207	0.72	0.99	2724	0.45	0.78
N_1004_786_7.lma	Nuremberg	Pinola	Female	291.6	2395	1174	2489	1174	1890	17	122	0.1	-0.3	59	249	4838	939	4838	939	1949	2160	4838	0.36	0	2395	0.44	0.81
N_1004_787_2.lma	Nuremberg	Pinola	Female	291.6	2489	1456	2489	1080	1993	21	219	0	-0.3	99	273	2489	986	2489	986	1989	2348	986	0.29	1	235	0.44	0.69
N_1004_856_2.lma	Nuremberg	Pinola	Female	351	1503	1456	2348	1080	1976	32	270	0.32	-0.14	165	888	1503	517	4368	423	2377	2207	1644	0.29	0.78	2301	0.46	0.7
N_1004_856_4.lma	Nuremberg	Pinola	Female	356.4	2020	986	2536	986	1909	33	254	0.28	-0.25	193	666	751	986	4744	751	2061	2395	751	0.33	0	2395	0.44	0.69
N_1004_892_48.lma	Nuremberg	Pinola	Female	232.2	2489	1738	2536	1127	2182	59	892	0.08	-0.19	129	1419	2489	658	5025	470	2371	2114	2489	0.67	0	2536	0.5	0.75
N_1004_892_53.lma	Nuremberg	Pinola	Female	178.2	2442	1738	2489	1738	2217	20	169	0.05	-0.23	52	228	658	1738	4885	658	2227	2254	658	0.45	0	2489	0.4	0.59
N_1004_892_55.lma	Nuremberg	Pinola	Female	207.9	2395	1503	2442	1503	2145	32	263	0.03	-0.2	81	398	2395	1503	4791	1503	2204	2254	2254	0.38	0.91	2395	0.51	0.71
N_1004_755_42.lma	Nuremberg	Pinola	Female	126.9	2536	2442	2583	2301	2498	19	178	0.2	-0.09	39	162	2536	2442	5119	2301	3686	5119	2442	0.3	1	2583	0.26	0.45
N_1004_755_46.lma	Nuremberg	Pinola	Female	121.5	2301	2254	2583	2160	2451	14	75	0.2	-0.13	90	286	2301	2254	5119	2160	2620	2254	2254	0.84	1	2583	0.13	0.24
N_1004_755_48.lma	Nuremberg	Pinola	Female	67.5	2489	2489	2583	2301	2491	23	113	0.17	-0.13	39	135	4978	4791	5119	2395	4862	4978	4838	0.46	0.92	2583	0.26	0.42
N_1004_755_53.lma	Nuremberg	Pinola	Female	124.2	2583	1691	2630	1691	2276	20	103	0.07	-0.5	85	252	892	1691	5260	892	2610	2020	1691	0.72	1	4227	0.33	0.53
N_1004_755_55.lma	Nuremberg	Pinola	Female	105.3	2536	2301	2630	2301	2527	32	150	0.24	-0.11	62	153	2536	2301	7796	2301	4210	7562	2536	0.55	0	2630	0.63	0.82
N_1004_770_10.lma	Nuremberg	Pinola	Female	159.3	2489	2771	2959	2254	2570	78	404	0.66	0.16	165	481	2489	2771	4978	2254	2970	2254	4885	0.48	0.17	2583	0.27	0.39
N_1004_770_9.lma	Nuremberg	Pinola	Female	191.7	2865	2207	3006	2207	2813	44	258	0.2	-0.05	80	530	2865	2207	5025	2207	2905	2912	2207	0.53	1	2160	0.28	0.56
N_1004_772_1.lma	Nuremberg	Pinola	Female	180.9	1832	2254	2771	1832	2434	40	441	0.05	-0.03	99	653	1832	2254	5166	1832	2821	2442	1832	0.59	0	2630	0.4	0.65
N_1004_772_2.lma	Nuremberg	Pinola	Female	299.7	2489	1503	2724	1456	2314	37	310	0.16	-0.16	105	488	939	1503	5213	939	2784	2395	1597	0.45	0.97	2630	0.41	0.69
N_1004_772_6.lma	Nuremberg	Pinola	Female	210.6	2254	1879	2536	1879	2293	29	188	0.38	-0.1	88	262	2254	1879	7562	376	3092	2207	1879	0.61	1	4978	0.54	0.76
N_1004_773_7.lma	Nuremberg	Pinola	Female	135	2630	2583	2724	1644	2500	62	488	0.12	-0.16	97	710	1127	2583	5166	1127	2988	2583	1127	0.27	0	2912	0.5	0.73
N_1004_781_2.lma	Nuremberg	Pinola	Female	140.4	2301	2442	2677	2254	2489	42	160	0.2	-0.01	85	225	2301	2442	7703	2254	2588	2489	2301	0.78	0	5166	0.54	0.78
N_1004_804_1.lma	Nuremberg	Pinola	Female	99.9	2442	2160	2442	2114	2145	18	125	0	-0.05	42	251	2442	2160	2442	2114	2145	2114	2301	0.58	0.03	141	0.31	0.58
N_1004_868_1.lma	Nuremberg	Pinola	Female	105.3	2020	1973	2160	1926	1976	26	122	0.61	0	33	184	2020	1973	2160	1926	1976	1926	2020	0.34	0	235	0.14	0.24
N_1004_888_1.lma	Nuremberg	Pinola	Female	108	2254	2160	2254	1879	2018	17	63	0	-0.06	71	200	2254	2160	2254	1879	2018	1973	2254	0.36	0	94	0.1	0.17
N_1004_916_1.lma	Nuremberg	Pinola	Female	105.3	2160	2067	2254	2067	2105	17	141	0.97	-0.04	25	184	2160	2067	2254	2067	2105	2114	2160	0.37	0	188	0.08	0.12
N_1004_917_1.lma	Nuremberg	Pinola	Female	186.3	2865	2677	2865	2348	2609	18	113	0	-0.12	52	292	2865	2677	2865	2348	2609	2536	2865	0.57	0	188	0.21	0.45
N_1004_918_1.lma	Nuremberg	Pinola	Female	137.7	2771	1973	2771	1973	2117	22	235	0	-0.2	70	415	2771	1973	2771	1973	2117	2020	2301	0.72	0.1	329	0.09	0.21
N_1004_754_3.lma	Nuremberg	Pinola	Female	861.3	2583	2114	3569	1221	2200	141	1390	0.53	-0.01	367	1438	2583	2114	5589	423	2222	2207	611	0.87	0.48	3757	0.58	0.72
N_1004_755_13.lma	Nuremberg	Pinola	Female	556.2	2677	2160	2677	1409	2175	25	366	0	-0.02	339	753	2677	2160	5354	1409	2423	2160	1503	0.94	0.68	2677	0.34	0.78
N_1004_754_4.lma	Nuremberg	Pinola	Female	170.1	2536	2160	2536	2114	2417	11	75	0	-0.15	57	123	2536	2160	5072	2114	2857	2442	2160	0.55	1	2583	0.45	0.68
N_1004_755_28.lma	Nuremberg	Pinola	Female	183.6	2630	1879	2630	1879	2361	20	157	0	-0.23	54	124	2630	1879	5871	1879	3254	2207	1879	0.67	1	3898	0.17	0.3
N_1004_755_29.lma	Nuremberg	Pinola	Female	156.6	2489	1503	2489	1503	2139	33	225	0	-0.33	69	280	5072	1503	5072	1503	2279	2254	3569	0.39	0.86	2536	0.21	0.43
N_1004_755_4.lma	Nuremberg	Pinola	Female	302.4	2583	1127	3241	1127	2189	71	827	0.73	-0.2	251	1300	2583	611	5166	611	2259	2442	611	0.15	1	2677	0.6	0.89
N_1004_755_52.lma	Nuremberg	Pinola	Female	145.8	2677	1691	2677	1691	2279	13	38	0	-0.42	45	137	2677	1691	2677	1691	2279	2489	1691	0.36	1	47	0.2	0.36
N_1004_755_58.lma	Nuremberg	Pinola	Female	194.4	2771	1597	2818	1597	2409	32	150	0.08	-0.34	117	258	2771	1597	8266	1597	3586	8219	2160	0.35	0.92	5542	0.28	0.52
N_1004_755_6.lma	Nuremberg	Pinola	Female	129.6	2254	1832	2254	1832	2140	23	157	0	-0.11	49	179	939	1832	4556	939	2331	2160	1879	0.65	0.94	3616	0.23	0.44
N_1004_755_62.lma	Nuremberg	Pinola	Female	113.4	2536	1738	2583	1738	2389	26	160	0.1	-0.39	148	303	2536	1738	4838	1738	2445	2583	1785	0.24	0.95	2348	0.35	0.59
N_1004_755_63.lma	Nuremberg	Pinola	Female	81	2630	1973	2630	1926	2400	38	225	0	-0.45	78	265	2630	1973	5213	1973	3596	5072	5025	0.34	0.9	3053	0.35	0.57
N_1004_771_22.lma	Nuremberg	Pinola	Female	270	2301	1127	2724	1127	2201	69	1080	0.56	-0.19	202	915	2301	1127	5025	1127	2758	4556	2677	0.58	0.83	2583	0.34	0.54
N_1004_772_8.lma	Nuremberg	Pinola	Female	237.6	1832	2301	2395	1597	2224	50	470	0.15	-0.11	144	659	892	2301	4744	892	2214	2395	892	0.53	0.02	2395	0.47	0.76
N_1004_773_27.lma	Nuremberg	Pinola	Female	170.1	2677	2301	2677	2020	2453	13	132	0	-0.18	79	184	2677	2301	5166	2020	3559	2348	2301	0.74	0.98	2583	0.21	0.39
N_1004_774_17.lma	Nuremberg	Pinola	Female	207.9	2254	1550	2254	1362	2037	30	451	0	-0.19	154	382	4274	1080	4274	1080	2192	2207	1597	0.37	0.8	2114	0.4	0.7
N_1004_774_2.lma	Nuremberg	Pinola	Female	226.8	2677	2207	2677	1268	2290	37	498	0	-0.27	151	603	2677	2207	2677	1268	2290	2583	1315	0.37	0.94	1127	0.21	0.43
N_1004_774_4.lma	Nuremberg	Pinola	Female	180.9	2724	2114	2724	1785	2425	43	441	0	-0.17	88	403	564	2114	2583	564	2392	2536	2348	0.42	0.67	2020	0.56	0.82
N_1004_774_8.lma	Nuremberg	Pinola	Female	180.9	2348	1127	3147	1127	2257	103	836	0.85	-0.23	230	1140	2348	1127	5025	1127	2747	2067	2348	0.62	0	2583	0.46	0.73
N_1004_786_2.lma	Nuremberg	Pinola	Female	245.7	2536	1832	2536	1127	2230	29	454	0	-0.21	119	664	2536	1033	9910	1033	2635	2207	1832	0.66	0.93	7421	0.22	0.33
N_1004_787_1.lma	Nuremberg	Pinola	Female	251.1	2489	1315	2536	1315	2115	18	141	0.04	-0.31	125	303	2489	1315	10051	1315	2514	2160	1315	0.54	1	7562	0.49	0.72
N_1004_808_1.lma	Nuremberg	Pinola	Female	151.2	3194	1127	3194	1127	2598	45	305	0	-0.34	182	1029	3429	423	5448	423	3715	5213	3429	0.73	0	2771	0.52	0.76
N_1004_755_20.lma	Nuremberg	Pinola	Female	199.8	2630	1268	2724	1268	2364	29	579	0.12	-0.23	71	704	2630	1268	5401	1268	2753	2348	2067	0.53	0.97	2771	0.32	0.63
N_1004_755_34.lma	Nuremberg	Pinola	Female	251.1	2677	1127	2724	1080	2198	30	197	0.01	-0.34	123	437	2677	1127	5401	1080	2508	2020	2020	0.66	0.82	2724	0.28	0.47
N_1004_755_36.lma	Nuremberg	Pinola	Female	207.9	2771	2348	2771	1503	2375	36	548	0	-0.31	96	534	5542	2348	7092	1503	3987	2160	2348	0.75	1	4650	0.3	0.51
N_1004_755_37.lma	Nuremberg	Pinola	Female	172.8	2630	2067	2630	1973	2392	19	153	0	-0.22	52	135	2630	2067	2630	1973	2392	2207	2067	0.73	1	235	0.2	0.35
N_1004_755_38.lma	Nuremberg	Pinola	Female	202.5	2583	1268	2724	1221	2181	38	517	0.07	-0.46	127	515	5166	1268	8031	1221	3025	5448	1221	0.18	0.97	2818	0.29	0.52
N_1004_755_54.lma	Nuremberg	Pinola	Female	218.7	2630	1597	2677	1268	2199	29	263	0.01	-0.32	58	367	2630	1597	5401	1268	2996	2536	1597	0.28	0.99	2865	0.27	0.5
N_1004_755_9.lma	Nuremberg	Pinola	Female	162	2583	2207	2583	1879	2254	23	157	0	-0.23	34	269	2583	2207	5025	1879	2734	2254	2207	0.56	1	2489	0.23	0.4
N_1004_826_1.lma	Nuremberg	Pinola	Female	194.4	2301	1785	3147	1644	2209	59	1080	0.99	-0.18	143	1229	2301	3569	3569	470	2311	2160	517	0.62	0.15	1926	0.39	0.63
N_1004_755_16.lma	Nuremberg	Pinola	Female	132.3	2677	2020	2724	2020	2512	21	197	0.12	-0.27	69	214	5354	2020	5448	2020	3121	2395	5448	0.69	0.1	2724	0.45	0.77
N_1004_774_1.lma	Nuremberg	Pinola	Female	162	2395	1832	2724	1550	2335	42	197	0.14	-0.31	112	405	2395	1832	4932	1550	2456	2207	2536	0.71	0.12	2583	0.3	0.51
N_1004_785_3a.lma	Nuremberg	Pinola	Female	253.8	2677	1221	2771	1174	2312	45	822	0.04	-0.26	183	598	5542	470	5542	423	2529	2489	5542	0.35	0	4509	0.46	0.78
N_1004_785_7.lma	Nuremberg	Pinola	Female	240.3	3241	2114	3241	1174	2267	68	1202	0	-0.5	141	1507	3241	423	5025	423	2245	2114	517	0.59	0.94	2536	0.41	0.62
N_1004_755_1.lma	Nuremberg	Pinola	Female	218.7	2818	2160	2818	1973	2460	19	141	0	-0.15	101	226	2818	705	5213	705	2697	5213	2114	0.22	0.98	2630	0.27	0.47
N_1004_755_26.lma	Nuremberg	Pinola	Female	199.8	2630	2067	2630	2067	2438	15	94	0	-0.13	74	194	5072	2067	5119	2067	3983	2207	2067	0.85	1	2583	0.31	0.53
N_1004_755_31.lma	Nuremberg	Pinola	Female	232.2	2442	1550	2536	1503	2300	28	244	0.09	-0.2	114	438	2442	1550	6998	1503	2752	2489	2020	0.39	0.86	4650	0.4	0.71
N_1004_755_32.lma	Nuremberg	Pinola	Female	207.9	2536	2160	2536	1926	2348	21	282	0	-0.16	80	338	2536	2160	5119	1926	2578	2489	2160	0.39	0.97	2583	0.39	0.73
N_1004_771_2.lma	Nuremberg	Pinola	Female	194.4	2067	2301	3006	1597	2326	66	432	0.48	-0.01	202	719	2067	611	3006	564	2142	2114	611	0.76	1	1268	0.28	0.5
N_1004_771_4.lma	Nuremberg	Pinola	Female	213.3	2254	2160	2630	2160	2401	21	141	0.35	-0.1	95	360	2254	2160	5072	2160	2596	2207	2207	0.83	0.05	2724	0.35	0.53
N_1004_786_1.lma	Nuremberg	Pinola	Female	175.5	2442	1738	2489	1738	2247	21	132	0.06	-0.2	74	271	2442	1738	4791	1738	2320	2254	1785	0.59	0.95	2395	0.29	0.58
N_1004_790_4.lma	Nuremberg	Pinola	Female	189	2207	1456	3194	1456	2183	76	639	0.93	-0.06	136	1096	2207	1456	4697	1456	2218	2207	1832	0.36	0.87	2489	0.33	0.52
N_1004_836_1.lma	Nuremberg	Pinola	Female	232.2	2160	1268	3288	1268	2317	113	564	0.88	-0.11	241	1144	2160	892	4321	705	2361	2395	705	0.48	0.96	2160	0.32	0.53
N_1004_839_1.lma	Nuremberg	Pinola	Female	178.2	2395	3523	3523	1738	2347	89	869	0.98	-0.22	189	1513	751	3523	3523	751	2289	2395	751	0.31	0.02	2160	0.32	0.53
N_1004_922_1.lma	Nuremberg	Pinola	Female	164.7	3335	2114	3335	2114	2591	37	150	0	-0.34	74	286	3335	2114	7562	2114	4108	2160	3335	0.93	0	5072	0.19	0.32
N_1004_816_1.lma	Nuremberg	Pinola	Female	221.4	1268	1221	3147	1174	1825	209	1099	0.63	0.06	326	1293	470	470	4556	470	1898	1691	470	0.46	0	3053	0.5	0.71
N_1004_821_1.lma	Nuremberg	Pinola	Female	121.5	1362	1691	1738	1033	1453	89	366	0.25	-0.26	155	507	376	564	1738	376	1293	1644	376	0.09	0	1268	0.61	0.74
N_1004_822_1.lma	Nuremberg	Pinola	Female	164.7	2677	1080	2771	1080	2049	33	141	0.05	-0.6	90	289	2677	1080	2771	423	1956	2207	2677	0.37	0.03	1738	0.5	0.65
N_1004_824_1.lma	Nuremberg	Pinola	Female	145.8	2254	1315	2489	1268	2013	54	357	0.19	-0.44	177	403	2254	1315	2489	376	1897	2254	376	0.38	0.21	1832	0.53	0.7
N_1004_829_1.lma	Nuremberg	Pinola	Female	151.2	2724	1080	2724	1080	2015	77	535	0	-0.38	173	797	2724	1080	2724	1080	2015	2114	2724	0.35	0	1033	0.45	0.69
N_1004_830_1.lma	Nuremberg	Pinola	Female	213.3	2114	1174	2724	1033	1776	55	329	0.03	-0.42	97	425	2114	376	5636	376	1897	2114	470	0.31	0.97	3569	0.4	0.62
N_1004_832_1.lma	Nuremberg	Pinola	Female	189	2489	1503	3288	1362	2248	74	620	0.35	-0.36	228	864	2489	1503	3288	1362	2248	2489	2489	0.39	0	798	0.54	0.7
N_1004_892_51.lma	Nuremberg	Pinola	Female	143.1	2724	2207	3194	1785	2235	54	385	0.17	-0.38	123	652	2724	2207	4744	1785	2419	2160	2254	0.48	0.94	2442	0.47	0.7
N_1004_908_1.lma	Nuremberg	Pinola	Female	126.9	2207	1644	2865	1644	2314	80	310	0.24	-0.2	206	452	2207	1644	2865	1644	2314	2160	2254	0.8	0.2	658	0.43	0.77
N_1004_754_2.lma	Nuremberg	Pinola	Female	291.6	1033	1127	2442	1033	2019	105	695	0.26	-0.11	295	1271	845	611	6998	611	2782	2160	845	0.55	0.01	4697	0.47	0.69
N_1004_755_30.lma	Nuremberg	Pinola	Female	283.5	1033	1409	2395	1033	2015	27	376	0.25	-0.16	234	1366	1033	1409	4650	1033	2137	2207	4650	0.59	0.16	2348	0.27	0.49
N_1004_755_64.lma	Nuremberg	Pinola	Female	175.5	2677	1268	2677	1268	2197	23	291	0	-0.46	92	423	2677	1268	5260	1268	2861	5025	1738	0.31	0.83	2583	0.22	0.38
N_1004_755_65.lma	Nuremberg	Pinola	Female	164.7	2583	1550	2630	1550	2267	33	207	0.05	-0.37	99	258	5166	1550	5307	1550	3501	5213	2114	0.25	0.88	2536	0.19	0.39
N_1004_771_15.lma	Nuremberg	Pinola	Female	264.6	2207	1550	2724	1550	2431	42	423	0.3	-0.02	117	836	2207	611	7327	517	3221	5072	2348	0.42	0.94	4932	0.37	0.6
N_1004_771_6.lma	Nuremberg	Pinola	Female	224.1	1926	3147	3147	1268	2159	69	622	0.99	-0.04	188	1065	376	423	4932	376	2417	2348	376	0.4	0	2442	0.36	0.65
N_1004_773_22.lma	Nuremberg	Pinola	Female	229.5	2724	2301	2771	2067	2529	17	103	0.01	-0.16	73	235	2724	2301	5213	2067	2739	2724	2160	0.25	0.93	2630	0.24	0.46
N_1004_773_9.lma	Nuremberg	Pinola	Female	218.7	2630	1503	2724	1503	2460	30	282	0.14	-0.22	139	535	5213	1503	5260	1503	2682	2677	2067	0.39	0.86	2630	0.32	0.65
N_1004_774_15.lma	Nuremberg	Pinola	Female	226.8	2207	1268	2301	1268	2160	40	554	0.1	-0.13	126	648	2207	1268	2301	1268	2160	2301	1268	0.46	0.99	798	0.41	0.66
N_1004_774_16.lma	Nuremberg	Pinola	Female	294.3	2067	1080	3147	1080	1873	58	921	0.95	-0.21	216	1775	4133	892	4180	845	1922	2160	1033	0.39	0.99	2020	0.45	0.71
N_1004_784_12.lma	Nuremberg	Pinola	Female	270	2536	1174	2536	1080	2182	41	423	0	-0.27	195	559	2536	423	4978	423	2199	2489	1456	0.25	0.85	2489	0.64	0.83
N_1004_785_4.lma	Nuremberg	Pinola	Female	237.6	2489	1315	2536	1315	2227	28	305	0.15	-0.22	106	483	2489	892	2536	892	2212	2160	1315	0.72	0.98	423	0.23	0.47
N_1004_785_6.lma	Nuremberg	Pinola	Female	275.4	2254	1174	2583	1174	2288	28	207	0.11	-0.17	115	704	2254	1174	5119	470	2364	2067	2489	0.83	0.04	2583	0.25	0.44
N_1004_790_3.lma	Nuremberg	Pinola	Female	183.6	2160	2207	2536	1362	2257	52	545	0.13	-0.18	111	624	2160	2207	2536	1362	2257	2207	2207	0.64	0.99	845	0.32	0.54
N_1004_817_2.lma	Nuremberg	Pinola	Female	137.7	2254	2114	2489	1926	2256	33	122	0.32	-0.09	81	229	2254	2114	2489	1926	2256	2254	2207	0.72	0.04	235	0.35	0.56
N_1004_819_1.lma	Nuremberg	Pinola	Female	234.9	2114	2114	2865	2020	2261	42	366	0.19	-0.06	93	528	2114	376	4978	376	2437	2207	2160	0.6	0.98	2724	0.55	0.76
N_1004_892_42.lma	Nuremberg	Pinola	Female	199.8	2677	1973	2818	1503	2475	31	488	0.12	-0.27	103	565	2677	1973	5119	1503	2544	2301	1973	0.7	1	2630	0.22	0.39
N_1004_892_45.lma	Nuremberg	Pinola	Female	159.3	2160	2160	2677	2020	2488	24	172	0.09	-0.16	100	540	2160	2160	5260	2020	2793	2489	2160	0.71	1	2630	0.22	0.34
N_1004_892_50.lma	Nuremberg	Pinola	Female	199.8	2348	1456	2395	1409	2154	17	94	0.15	-0.22	90	383	2348	1456	4791	1409	2810	2160	2395	0.62	0.21	2395	0.45	0.69
N_1004_893_1.lma	Nuremberg	Pinola	Female	205.2	1268	1409	2301	1221	1933	22	225	0.31	-0.17	240	969	1268	423	2301	423	1910	2160	1268	0.55	0.04	845	0.24	0.47
N_1004_755_33.lma	Nuremberg	Pinola	Female	218.7	2489	1597	3429	1597	2356	60	1024	0.92	-0.2	148	1393	2489	1597	5307	1597	2758	2583	3429	0.38	0.94	2677	0.21	0.41
N_1004_755_41.lma	Nuremberg	Pinola	Female	175.5	2489	1691	2630	1691	2320	38	344	0.17	-0.23	84	277	2489	1691	7890	1691	2764	2489	1691	0.36	1	5307	0.4	0.68
N_1004_755_43.lma	Nuremberg	Pinola	Female	94.5	2536	2536	2724	2254	2499	31	188	0.18	-0.26	60	248	5166	2536	5401	2254	3104	2536	2536	0.47	1	2724	0.27	0.38
N_1004_755_45.lma	Nuremberg	Pinola	Female	132.3	2583	2067	2771	2020	2460	28	113	0.04	-0.34	68	260	5354	2067	7280	2020	3899	2489	5495	0.54	0.02	4932	0.38	0.55
N_1004_755_47.lma	Nuremberg	Pinola	Female	124.2	2583	2254	2583	2207	2418	13	38	0	-0.18	44	88	2583	2254	4885	2207	2470	2301	2254	0.69	1	2489	0.2	0.39
N_1004_755_49.lma	Nuremberg	Pinola	Female	81	2583	2207	2724	2207	2516	14	35	0.14	-0.37	54	184	2583	2207	8219	2207	3029	2536	2583	0.55	0	5495	0.17	0.34
N_1004_755_50.lma	Nuremberg	Pinola	Female	151.2	2677	1973	2677	1926	2316	13	47	0	-0.28	18	65	5307	3804	5307	1926	3674	4885	3804	0.35	0.98	2630	0.13	0.3
N_1004_755_51.lma	Nuremberg	Pinola	Female	226.8	2865	1268	2912	1268	2258	24	291	0.01	-0.41	54	408	5730	1268	5730	1268	3293	5542	2160	0.19	0.82	3569	0.27	0.47
N_1004_755_57.lma	Nuremberg	Pinola	Female	207.9	2771	1362	2771	1362	2227	16	78	0	-0.34	35	255	2771	1362	5401	1362	2262	2630	1409	0.17	0.99	2724	0.18	0.3
N_1004_755_59.lma	Nuremberg	Pinola	Female	126.9	2630	1832	2677	1832	2400	31	188	0.04	-0.43	96	290	2630	1832	5401	1832	3015	2536	2677	0.48	0.07	2724	0.29	0.51
N_1004_755_60.lma	Nuremberg	Pinola	Female	237.6	2583	1315	3476	1315	2088	44	1296	0.67	-0.35	83	1628	2583	1315	5307	1174	2738	2630	1315	0.15	0.99	2677	0.16	0.27
N_1004_755_61.lma	Nuremberg	Pinola	Female	232.2	2536	1268	2724	1174	2129	46	554	0.04	-0.38	123	730	2536	1268	5495	1174	2225	2489	1644	0.35	0.84	2771	0.27	0.47
N_1004_771_16.lma	Nuremberg	Pinola	Female	210.6	1409	892	2442	892	1908	74	517	0.03	-0.2	327	854	1409	611	6106	611	2816	4415	3429	0.56	0.29	4086	0.44	0.65
N_1004_771_18.lma	Nuremberg	Pinola	Female	245.7	2442	1080	2583	1080	2210	45	977	0.94	-0.24	161	826	4838	1080	5683	1080	3816	2207	1221	0.61	0.96	3476	0.42	0.71
N_1004_773_16.lma	Nuremberg	Pinola	Female	232.2	2536	1503	2536	1268	2100	40	770	0	-0.19	98	977	2536	1503	5025	1503	2300	2160	1785	0.56	0.87	2536	0.34	0.6
N_1004_773_28.lma	Nuremberg	Pinola	Female	178.2	2583	2301	2771	2301	2600	10	38	0.34	-0.1	95	170	5213	2301	7280	2301	3074	2724	2301	0.48	1	4885	0.18	0.32
N_1004_773_29.lma	Nuremberg	Pinola	Female	194.4	2489	1409	2536	1409	2196	25	225	0.11	-0.3	126	407	2489	1409	5824	1409	3031	2254	5777	0.49	0.77	3569	0.39	0.68
Z_1013_2202_2.lma	Zlin	Baru	Male	78.3	2677	1785	2865	1785	2706	58	446	0.25	-0.35	153	707	2677	376	8172	376	4360	376	2677	1	0	5495	0.66	0.85
Z_1013_2212_3.lma	Zlin	Baru	Male	213.3	1973	1456	3523	1362	2348	72	986	0.81	-0.28	300	1504	1973	1221	7562	1221	3216	2724	1973	0.32	0	5072	0.62	0.87
Z_1013_2200_1.lma	Zlin	Baru	Male	116.1	2583	2630	2818	2583	2740	15	66	0.17	-0.03	46	185	2583	2630	5495	2583	3121	2771	2724	0.5	0.95	2771	0.33	0.65
Z_1013_2204_1.lma	Zlin	Baru	Male	132.3	2677	2630	2818	2630	2701	10	56	0.08	-0.08	23	109	2677	423	7890	376	4359	5401	376	0.56	0.98	5260	0.35	0.71
Z_1013_2220_1.lma	Zlin	Baru	Male	145.8	2630	2583	2865	1973	2588	41	564	0.28	-0.13	99	766	705	2583	5542	658	2784	2536	705	0.47	0	4885	0.75	0.87
Z_1013_2222_1.lma	Zlin	Baru	Male	97.2	2818	2583	2912	2254	2504	26	75	0.03	-0.26	148	291	2818	5166	5166	2254	2575	2301	2818	0.46	0	2583	0.17	0.24
Z_1013_2191_1.lma	Zlin	Baru	Male	102.6	2489	2630	2677	2348	2602	24	169	0.38	0.04	58	264	2489	2630	8031	658	3764	2630	2677	0.32	0.84	5354	0.68	0.86
Z_1013_2206_1.lma	Zlin	Baru	Male	108	2630	2630	4274	2207	2954	185	780	0.77	0.63	388	1008	2630	2630	7515	798	3879	5542	2630	0.46	0	4885	0.67	0.86
Z_1013_2208_2.lma	Zlin	Baru	Male	135	1926	2630	2818	1926	2687	35	360	0.18	0	110	757	423	5542	8360	376	5140	5683	376	0.37	0.02	5542	0.67	0.86
Z_1013_2212_1.lma	Zlin	Baru	Male	81	2630	2771	2865	2630	2737	18	47	0.24	-0.03	52	129	2630	2771	5730	2630	2929	2771	2630	0.48	0	2912	0.76	0.87
Z_1013_2212_4.lma	Zlin	Baru	Male	234.9	2489	2160	2818	1221	2169	94	763	0.13	-0.35	270	1141	2489	611	5636	611	2452	2677	2489	0.3	0	4086	0.74	0.88
S_T2_1304_1.lma	Stuttgart	Ketiga	Male	78.3	2865	3757	3898	2865	3675	58	188	0.89	0.47	169	522	939	1174	6622	517	3667	3804	939	0.61	0	5307	0.44	0.56
S_T2_1312_4.lma	Stuttgart	Ketiga	Male	70.2	3663	3710	3851	2912	3644	76	485	0.2	-0.49	207	514	7139	7515	7703	2959	7215	7656	7139	0.44	0	4603	0.29	0.43
S_T2_1001_1.lma	Stuttgart	Ketiga	Male	151.2	3476	2818	3476	2630	2883	27	113	0	-0.17	138	383	3476	2818	5918	2630	3226	2677	2818	0.58	1	2959	0.11	0.24
S_T2_1001_2.lma	Stuttgart	Ketiga	Male	167.4	2912	2489	2912	2489	2667	17	94	0	-0.07	99	206	2912	2489	5636	2489	3287	2771	2489	0.15	1	2771	0.1	0.16
S_T2_1003_1.lma	Stuttgart	Ketiga	Male	156.6	3429	3194	3429	2912	3088	48	188	0	0	117	339	3429	3194	6434	2912	3727	2959	3194	0.44	1	3476	0.12	0.2
S_T2_1006_1.lma	Stuttgart	Ketiga	Male	164.7	3569	3053	3616	2724	3177	21	169	0.02	-0.23	107	210	3569	3053	7092	2724	3363	3053	3053	0.43	1	3523	0.22	0.38
S_T2_1008_2.lma	Stuttgart	Ketiga	Male	170.1	3429	2959	3569	2724	3007	32	132	0.08	-0.24	163	306	3429	2959	5871	2724	3379	2724	3429	0.61	0	3147	0.22	0.38
S_T2_1013_1.lma	Stuttgart	Ketiga	Male	140.4	3429	2489	3429	2489	2723	35	169	0	-0.31	127	378	3429	2489	3429	2489	2723	2865	2489	0.27	1	282	0.12	0.18
S_T2_1015_1.lma	Stuttgart	Ketiga	Male	170.1	3429	3194	3616	2583	3206	46	451	0.1	-0.28	92	394	3429	3194	8407	2583	3948	3382	3194	0.29	1	5589	0.17	0.31
S_T2_1016_1.lma	Stuttgart	Ketiga	Male	175.5	3476	2865	3523	2865	3080	41	188	0.02	-0.21	118	319	3476	2865	6012	2865	3215	3100	2865	0.3	1	3147	0.17	0.29
S_T2_1017_1.lma	Stuttgart	Ketiga	Male	167.4	2959	2959	3006	2724	2865	18	113	0.97	0.05	59	190	2959	2959	5965	2724	3007	2818	3006	0.13	0.97	3006	0.13	0.25
S_T2_1019_1.lma	Stuttgart	Ketiga	Male	143.1	3335	2959	3335	2818	3053	26	176	0	0	122	282	3335	2959	3335	2818	3053	2865	3147	0.4	0.98	282	0.11	0.2
S_T2_1025_1.lma	Stuttgart	Ketiga	Male	164.7	3523	2724	3616	2724	3211	25	150	0.15	-0.33	65	174	7092	2724	7280	2724	4509	3194	2724	0.43	0.98	3757	0.18	0.3
S_T2_1028_1.lma	Stuttgart	Ketiga	Male	199.8	3523	2301	3569	2301	2913	51	297	0.01	-0.2	145	323	3523	2301	7984	2301	3538	2865	2301	0.32	1	5213	0.14	0.27
S_T2_1029_1.lma	Stuttgart	Ketiga	Male	118.8	3241	2912	3241	2677	2840	21	103	0	-0.19	97	267	3241	2912	3241	2677	2840	2818	2771	0.3	0.91	188	0.12	0.22
S_T2_1035_1.lma	Stuttgart	Ketiga	Male	164.7	3288	2865	3335	2630	2850	25	129	0.02	-0.05	150	413	3288	2865	3335	2630	2850	2771	2865	0.32	1	235	0.11	0.21
S_T2_1036_1.lma	Stuttgart	Ketiga	Male	129.6	3710	3053	3710	2959	3248	13	56	0	-0.19	147	321	7374	3053	7374	2959	3477	3006	3053	0.4	1	3663	0.09	0.17
S_T2_1037_1.lma	Stuttgart	Ketiga	Male	121.5	3429	3147	3429	2865	3099	25	225	0	0	147	331	3429	3147	6294	2865	3238	3147	3147	0.16	1	3147	0.11	0.26
S_T2_1039_1.lma	Stuttgart	Ketiga	Male	153.9	3429	2771	3429	2771	2955	34	141	0	-0.1	128	346	6951	5683	6951	2771	3536	2912	5683	0.23	1	3523	0.11	0.21
S_T2_1043_1.lma	Stuttgart	Ketiga	Male	151.2	3241	3053	3241	2677	2889	17	122	0	0.02	139	372	3241	3053	5918	2677	2992	2724	3053	0.4	0.96	3100	0.09	0.14
S_T2_1044_1.lma	Stuttgart	Ketiga	Male	178.2	3476	3147	3569	2912	3141	34	188	0.03	-0.03	123	380	3476	3147	6341	2912	3678	2959	3147	0.37	1	3382	0.18	0.34
S_T2_1046_1.lma	Stuttgart	Ketiga	Male	129.6	3476	2771	3476	2724	2952	37	188	0	-0.12	149	396	3476	2771	6012	2724	3408	2959	2771	0.21	1	3100	0.11	0.2
S_T2_1047_1.lma	Stuttgart	Ketiga	Male	129.6	3382	2912	3382	2771	2965	45	150	0	-0.07	133	341	3382	2912	6059	2771	3439	2912	2771	0.26	0.94	2959	0.12	0.2
S_T2_1157_1.lma	Stuttgart	Ketiga	Male	137.7	3616	2771	3616	2724	2964	26	103	0	-0.28	140	325	7186	2771	7186	2724	3105	2959	2912	0.3	0.92	3616	0.26	0.43
S_T2_1178_1.lma	Stuttgart	Ketiga	Male	135	3288	2959	3288	2677	2890	20	106	0	0.02	116	417	3288	5354	6106	2677	3735	2724	5354	0.53	0.98	3100	0.1	0.16
S_T2_1312_10.lma	Stuttgart	Ketiga	Male	148.5	3851	3382	3851	3147	3435	25	150	0	-0.12	183	324	3851	3382	6951	3147	3499	3147	3382	0.48	1	3476	0.11	0.19
S_T2_1312_12.lma	Stuttgart	Ketiga	Male	113.4	3757	3382	3757	3335	3489	20	66	0	-0.19	64	150	3757	3382	6763	3335	3571	3476	3382	0.39	1	3382	0.13	0.21
S_T2_1312_14.lma	Stuttgart	Ketiga	Male	175.5	3804	2818	3851	2771	3319	38	207	0.02	-0.46	120	362	3804	5589	6528	2771	4124	3710	2771	0.33	0.97	3288	0.18	0.33
S_T2_1312_16.lma	Stuttgart	Ketiga	Male	153.9	3757	3429	3757	3382	3519	26	103	0	-0.06	99	171	7515	6857	7562	3382	4379	3382	6857	0.41	1	3804	0.11	0.23
S_T2_1312_17.lma	Stuttgart	Ketiga	Male	145.8	3663	3335	3851	3288	3482	24	125	0.02	-0.17	101	214	3663	3335	6763	3288	3730	3616	3335	0.25	1	3382	0.11	0.19
S_T2_1314_1.lma	Stuttgart	Ketiga	Male	121.5	3663	3569	3663	3382	3562	16	94	0	-0.06	39	142	3663	3569	7374	3382	4132	3523	3663	0.55	0	3663	0.12	0.22
S_T2_945_1.lma	Stuttgart	Ketiga	Male	143.1	3804	2818	3804	2818	3320	31	188	0	-0.17	119	311	7468	8360	8877	3194	5055	3194	8642	0.31	0.9	5589	0.11	0.17
S_T2_946_2.lma	Stuttgart	Ketiga	Male	145.8	3710	3335	3710	2912	3299	47	178	0	-0.16	101	279	3710	3335	3710	2912	3299	3288	3335	0.32	1	423	0.15	0.27
S_T2_946_3.lma	Stuttgart	Ketiga	Male	167.4	3523	2865	3663	2771	3091	35	103	0.03	-0.19	190	351	3523	2865	3663	2771	3091	2865	3100	0.43	0.97	235	0.09	0.18
S_T2_949_1.lma	Stuttgart	Ketiga	Male	145.8	3616	3100	3616	2771	3167	31	150	0	-0.17	110	322	7233	3100	8454	2959	3985	3100	3100	0.28	0.79	3616	0.15	0.25
S_T2_951_1.lma	Stuttgart	Ketiga	Male	178.2	3710	3241	3710	2583	3220	53	317	0	-0.24	125	386	3710	3241	7374	2583	3769	3194	3241	0.48	1	3804	0.15	0.27
S_T2_952_1.lma	Stuttgart	Ketiga	Male	167.4	3382	2583	3382	2583	3182	47	407	0	-0.11	100	435	3382	5260	6716	2818	3907	3194	5260	0.36	1	3429	0.13	0.22
S_T2_953_1.lma	Stuttgart	Ketiga	Male	167.4	3523	3147	3569	2771	3208	31	160	0.05	-0.17	105	250	3523	3147	5636	2771	3426	3382	3147	0.21	1	2818	0.15	0.33
S_T2_953_2.lma	Stuttgart	Ketiga	Male	207.9	3616	3053	3616	2724	3019	44	178	0	-0.12	171	390	3616	3053	6247	2724	3307	2771	3100	0.46	0.95	3382	0.13	0.26
S_T2_954_1.lma	Stuttgart	Ketiga	Male	186.3	3616	2677	3757	2677	3285	56	301	0.03	-0.24	114	303	7374	5448	7468	2912	4440	3241	7374	0.4	0	3945	0.15	0.24
S_T2_955_1.lma	Stuttgart	Ketiga	Male	175.5	3757	2865	3757	2771	3062	23	82	0	-0.31	167	312	7515	2865	8736	2771	4205	2818	2865	0.5	1	5918	0.16	0.25
S_T2_956_1.lma	Stuttgart	Ketiga	Male	189	1691	2865	3616	1691	3247	64	1190	0.04	-0.16	107	1810	751	2865	7186	751	3437	3241	751	0.45	0	6434	0.21	0.31
S_T2_956_2.lma	Stuttgart	Ketiga	Male	175.5	3569	2818	3569	2724	2889	38	207	0	-0.15	136	453	3569	2818	5448	2724	2964	2724	2724	0.52	0.98	2724	0.12	0.22
S_T2_959_1.lma	Stuttgart	Ketiga	Male	151.2	3429	2959	3429	2912	3126	32	197	0	-0.02	122	277	3429	5448	5636	2912	3258	3006	5636	0.24	0.93	2677	0.11	0.2
S_T2_962_1.lma	Stuttgart	Ketiga	Male	172.8	3569	2395	4697	2395	3217	109	1519	0.95	-0.18	243	1723	3569	6622	7327	2442	3557	3194	6622	0.27	1	3710	0.13	0.24
S_T2_964_1.lma	Stuttgart	Ketiga	Male	162	3616	3147	3616	2771	3292	55	338	0	-0.1	130	420	3616	3147	6575	2771	3572	3241	3147	0.2	1	3335	0.14	0.27
S_T2_972_1.lma	Stuttgart	Ketiga	Male	153.9	3429	2959	3429	2818	3101	29	272	0	-0.1	123	260	3429	2959	3429	2818	3101	3194	2959	0.18	1	423	0.11	0.19
S_T2_973_1.lma	Stuttgart	Ketiga	Male	159.3	3523	3100	3523	2818	3144	43	282	0	-0.1	103	253	3523	5307	6387	2818	3835	3100	5307	0.22	0.97	3335	0.13	0.21
S_T2_975_1.lma	Stuttgart	Ketiga	Male	151.2	3523	3194	3523	3053	3185	18	78	0	-0.03	63	305	3523	3194	6341	3053	3430	3147	3194	0.42	0.85	3194	0.13	0.21
S_T2_976_1.lma	Stuttgart	Ketiga	Male	172.8	3663	3147	3663	2818	3244	24	254	0	-0.17	107	250	3663	3147	5589	3053	3326	3147	3147	0.33	1	2489	0.12	0.24
S_T2_977_1.lma	Stuttgart	Ketiga	Male	167.4	3569	2912	3569	2771	3053	30	85	0	-0.18	119	253	3569	2912	6153	2771	3538	3147	2771	0.21	0.95	3100	0.13	0.2
S_T2_990_1.lma	Stuttgart	Ketiga	Male	164.7	3476	2912	3476	2865	3032	21	103	0	-0.22	105	239	3476	2912	3476	2865	3032	2865	2865	0.38	0.95	235	0.16	0.27
S_T2_994_1.lma	Stuttgart	Ketiga	Male	151.2	3616	2818	3616	2771	2971	55	160	0	-0.16	142	439	7327	2818	7327	2771	3250	2771	2771	0.4	0.95	3898	0.14	0.25
S_T2_997_1.lma	Stuttgart	Ketiga	Male	175.5	3335	2677	3335	2630	2825	25	103	0	-0.07	108	398	3335	2677	5307	2630	2900	2865	2771	0.19	0.97	2536	0.13	0.25
S_T2_998_1.lma	Stuttgart	Ketiga	Male	221.4	3429	2959	3429	2630	2855	41	225	0	-0.04	159	503	3429	2959	5918	2630	3462	2630	2865	0.42	0.95	3194	0.18	0.35
S_T2_1284_1.lma	Stuttgart	Ketiga	Male	97.2	1550	1597	3053	1550	2892	144	971	0.09	-0.06	232	1393	986	892	6059	892	3933	3006	1033	0.37	0.97	5025	0.32	0.46
S_T2_992_2.lma	Stuttgart	Ketiga	Male	99.9	3241	3100	3616	2630	3290	84	564	0.19	-0.23	137	846	3241	3100	10614	705	4308	3194	986	0.64	0.08	7468	0.36	0.48
S_T2_1316_1.lma	Stuttgart	Ketiga	Male	89.1	3523	3100	3569	3100	3413	27	122	0.03	-0.29	82	219	3523	3100	6857	3100	3518	3523	3100	0.22	1	3335	0.12	0.2
S_T2_1018_1.lma	Stuttgart	Ketiga	Male	99.9	3241	3194	3429	2630	3124	48	216	0.14	-0.35	132	369	3241	3194	5965	2630	3205	3335	3194	0.31	1	3147	0.17	0.31
S_T2_1026_1.lma	Stuttgart	Ketiga	Male	126.9	3194	1644	3382	1644	2954	67	404	0.26	-0.65	241	762	3194	1644	6669	986	4107	5824	4932	0.65	0.96	3945	0.23	0.38
S_T2_1005_1.lma	Stuttgart	Ketiga	Male	189	3288	3335	3710	2630	3329	37	310	0.29	-0.23	161	420	3288	3335	6622	2818	3615	3569	3288	0.38	0.03	3335	0.24	0.39
S_T2_1020_1.lma	Stuttgart	Ketiga	Male	145.8	3335	2489	3382	2489	3098	28	85	0.02	-0.34	103	248	3335	2489	6622	2489	3717	3335	2489	0.26	1	3476	0.2	0.34
S_T2_1040_1.lma	Stuttgart	Ketiga	Male	162	3288	3006	3569	3006	3278	22	150	0.12	-0.21	52	275	3288	3006	7186	3006	3743	3241	3476	0.51	0.1	3663	0.2	0.35
S_T2_1307_1.lma	Stuttgart	Ketiga	Male	153.9	3663	3053	3710	3053	3496	20	122	0.02	-0.26	75	190	11131	3053	11131	3053	5752	3288	3100	0.71	0.98	7421	0.21	0.35
S_T2_1308_1.lma	Stuttgart	Ketiga	Male	153.9	1926	3053	3804	1926	3448	52	705	0.32	0	289	1521	1409	3053	7609	1409	5039	3288	1409	0.8	0	4086	0.33	0.49
S_T2_1309_1.lma	Stuttgart	Ketiga	Male	170.1	2818	3147	3710	2818	3399	28	117	0.24	-0.02	183	607	611	3147	7468	564	4530	3523	611	0.53	0	5495	0.29	0.48
S_T2_1310_1.lma	Stuttgart	Ketiga	Male	99.9	3569	3241	3710	3241	3525	14	66	0.25	-0.28	78	188	7233	3241	10990	3241	6226	6481	7280	0.86	0.25	3710	0.23	0.36
S_T2_1311_1.lma	Stuttgart	Ketiga	Male	108	3757	3194	3851	2114	3346	189	1033	0.1	-0.38	276	1546	7515	3194	7703	2395	5811	7280	3053	0.41	0.95	3804	0.23	0.39
S_T2_1312_13.lma	Stuttgart	Ketiga	Male	167.4	3663	3006	3898	2771	3417	31	132	0.26	-0.4	147	340	751	3006	7703	751	3805	3476	7374	0.51	0.03	6622	0.21	0.38
S_T2_1312_18.lma	Stuttgart	Ketiga	Male	99.9	3757	3804	3898	2912	3776	51	634	0.31	-0.09	87	791	7515	7468	7750	3710	5330	3851	7421	0.28	0.97	3898	0.19	0.35
S_T2_1312_7.lma	Stuttgart	Ketiga	Male	126.9	1785	3429	3757	1785	3448	65	1174	0.15	-0.24	190	1920	6951	3429	11178	3100	5250	7139	6951	0.5	0	3804	0.32	0.52
S_T2_1317_1.lma	Stuttgart	Ketiga	Male	156.6	3006	3241	3476	3006	3246	29	106	0.21	-0.02	76	271	3006	6247	6528	3006	4324	6294	3006	0.81	0	3288	0.2	0.37
S_T2_1318_1.lma	Stuttgart	Ketiga	Male	113.4	3335	2818	3616	2818	3303	42	197	0.17	-0.32	141	281	3335	2818	7233	2818	5530	6059	2818	0.76	1	3898	0.19	0.34
S_T2_1319_1.lma	Stuttgart	Ketiga	Male	156.6	3476	3429	3616	2818	3391	44	254	0.14	-0.13	82	428	6857	3429	8736	3288	5514	3335	3429	0.4	1	5401	0.15	0.24
S_T2_1320_1.lma	Stuttgart	Ketiga	Male	145.8	3710	3241	3710	2442	3322	43	611	0	-0.3	84	524	3710	5871	8830	2959	3613	3241	3288	0.49	0.96	5871	0.13	0.23
S_T2_946_1.lma	Stuttgart	Ketiga	Male	162	3663	3382	3710	2583	3308	43	441	0.02	-0.39	117	617	3663	1080	7374	1080	4173	3382	1080	0.46	1	3616	0.22	0.43
S_T2_950_1.lma	Stuttgart	Ketiga	Male	151.2	3241	3053	3710	2912	3361	27	169	0.11	-0.23	119	419	3241	3053	7468	2912	4733	3335	3241	0.55	0	3898	0.19	0.34
S_T2_957_1.lma	Stuttgart	Ketiga	Male	156.6	3288	3241	3569	2865	3252	38	169	0.16	-0.14	97	240	3288	3241	7233	3053	4234	3288	3241	0.39	0.96	3992	0.16	0.28
S_T2_958_1.lma	Stuttgart	Ketiga	Male	170.1	3241	2160	3663	2160	3250	64	488	0.23	-0.23	127	755	3241	2160	7327	2160	4522	3429	2160	0.39	1	3992	0.19	0.32
S_T2_967_1.lma	Stuttgart	Ketiga	Male	126.9	3288	1691	3663	1691	3294	82	971	0.13	-0.48	195	1088	3288	1691	3663	1691	3294	3241	3288	0.63	0	1456	0.26	0.37
S_T2_971_1.lma	Stuttgart	Ketiga	Male	180.9	3288	3288	3757	2724	3269	39	344	0.11	-0.24	116	398	3288	3288	8078	2724	4646	3335	3288	0.36	1	5354	0.19	0.34
S_T2_974_1.lma	Stuttgart	Ketiga	Male	197.1	3288	2583	3757	2583	3394	57	451	0.14	-0.22	146	481	3288	2583	8689	2583	3679	3523	2583	0.4	1	5777	0.19	0.34
S_T2_978_1.lma	Stuttgart	Ketiga	Male	143.1	3335	2348	3429	2348	3106	69	451	0.21	-0.37	163	415	3335	2348	6387	2348	3961	3288	2583	0.42	0.83	3147	0.2	0.35
S_T2_979_1.lma	Stuttgart	Ketiga	Male	132.3	3616	3006	3804	3006	3499	17	78	0.1	-0.36	65	290	3616	6106	11366	3100	6730	6998	3616	0.52	0	7609	0.16	0.32
S_T2_980_1.lma	Stuttgart	Ketiga	Male	172.8	3616	2724	3663	2442	3288	40	407	0.06	-0.35	111	561	376	5401	7374	376	5250	3429	5401	0.45	1	6857	0.15	0.29
S_T2_981_1.lma	Stuttgart	Ketiga	Male	180.9	3663	2677	3710	2442	3345	34	387	0.06	-0.36	100	381	3663	5542	7984	2818	4731	3382	5542	0.59	1	5119	0.14	0.23
S_T2_982_1.lma	Stuttgart	Ketiga	Male	137.7	3335	2207	3663	2207	3301	37	244	0.14	-0.49	226	585	3335	2207	10896	2207	4164	3288	2207	0.64	1	7233	0.22	0.36
S_T6_1098_1.lma	Stuttgart	Penang	Male	113.4	3147	3476	3476	2818	2961	50	258	1	0	99	514	3147	8595	8642	2865	5050	5824	8642	0.54	0.95	2865	0.31	0.45
S_T6_1192_1.lma	Stuttgart	Penang	Male	108	2912	2959	3053	2677	2917	44	263	0.46	-0.03	73	224	892	5683	8407	892	5278	6012	5683	0.46	1	3053	0.33	0.46
S_T6_1256_1.lma	Stuttgart	Penang	Male	132.3	2348	2818	3241	1644	2746	126	783	0.38	-0.28	233	809	2348	1268	3241	798	2697	2865	2301	0.5	0.92	1550	0.26	0.39
S_T6_1009_1.lma	Stuttgart	Penang	Male	170.1	2583	2489	2818	2489	2594	30	150	0.02	-0.04	68	181	2583	2489	2818	2489	2594	2583	2724	0.26	0.9	235	0.12	0.22
S_T6_1012_1.lma	Stuttgart	Penang	Male	189	3194	3100	3523	2959	3132	37	150	0.12	-0.07	89	307	892	3100	8360	892	3724	3006	892	0.43	0	5260	0.24	0.36
S_T6_1021_1.lma	Stuttgart	Penang	Male	194.4	3006	3241	3569	2959	3287	24	188	0.2	-0.06	72	424	3006	3241	5918	939	3746	3288	939	0.37	0.96	2677	0.2	0.35
S_T6_1049_1.lma	Stuttgart	Penang	Male	129.6	3006	2395	3006	2301	2522	25	94	0	-0.23	103	261	3006	2395	5542	2301	2706	2395	2395	0.51	1	3147	0.11	0.2
S_T6_1050_1.lma	Stuttgart	Penang	Male	105.3	3241	2489	3288	2442	2689	24	132	0.03	-0.44	120	285	3241	2489	3288	2442	2689	2865	2536	0.24	0.95	329	0.1	0.19
S_T6_1051_1.lma	Stuttgart	Penang	Male	151.2	2912	2442	2912	2254	2490	23	85	0	-0.21	91	221	2912	2442	2912	2254	2490	2583	2442	0.29	0.98	141	0.11	0.22
S_T6_1052_1.lma	Stuttgart	Penang	Male	132.3	3335	3006	3335	2959	3083	10	47	0	-0.13	47	130	3335	3006	3335	2959	3083	3194	3006	0.31	1	47	0.13	0.24
S_T6_1053_1.lma	Stuttgart	Penang	Male	121.5	3053	2818	3053	2583	2826	32	141	0	-0.14	91	223	3053	2818	5683	2583	3141	2771	2865	0.39	0.98	2912	0.15	0.27
S_T6_1054_1.lma	Stuttgart	Penang	Male	172.8	3147	2630	3288	2254	2591	32	160	0.03	-0.22	225	439	3147	2630	3288	2254	2591	2301	2630	0.59	1	282	0.1	0.19
S_T6_1055_1.lma	Stuttgart	Penang	Male	124.2	3006	2536	3006	2489	2641	16	38	0	-0.21	64	153	3006	2536	3006	2489	2641	2771	2536	0.24	1	47	0.09	0.15
S_T6_1058_1.lma	Stuttgart	Penang	Male	145.8	3053	2160	3053	2160	2400	13	125	0	-0.34	85	236	3053	2160	5589	2160	2555	2348	3053	0.45	0	2818	0.09	0.16
S_T6_1060_1.lma	Stuttgart	Penang	Male	148.5	3429	2254	3429	2254	2590	38	219	0	-0.3	175	471	3429	2254	3429	2254	2590	2348	2254	0.56	1	329	0.09	0.2
S_T6_1061_1.lma	Stuttgart	Penang	Male	132.3	3194	2771	3429	2771	2992	32	132	0.08	-0.25	144	233	3194	2771	5918	2771	3484	2912	2771	0.35	1	3053	0.13	0.22
S_T6_1062_1.lma	Stuttgart	Penang	Male	153.9	2771	2442	2771	2114	2305	20	219	0	-0.24	79	451	2771	2442	4932	2114	2446	2114	2442	0.7	1	2771	0.09	0.15
S_T6_1063_1.lma	Stuttgart	Penang	Male	143.1	2912	2207	2912	2207	2383	9	63	0	-0.27	75	205	2912	4415	4415	2207	2465	2489	4415	0.29	1	2207	0.12	0.25
S_T6_1065_1.lma	Stuttgart	Penang	Male	148.5	2959	2301	2959	2207	2460	36	211	0	-0.14	137	366	2959	2301	2959	2207	2460	2630	2301	0.15	1	376	0.09	0.17
S_T6_1066_1.lma	Stuttgart	Penang	Male	132.3	3100	2959	3429	2912	3081	35	204	0.04	-0.18	76	180	3100	2959	6012	2959	3674	3194	5683	0.25	0.83	3053	0.17	0.3
S_T6_1067_1.lma	Stuttgart	Penang	Male	137.7	3147	3006	3241	2912	3075	20	113	0.12	-0.14	82	163	6247	3006	6481	2912	3263	2959	6247	0.6	0	3241	0.11	0.18
S_T6_1068_1.lma	Stuttgart	Penang	Male	121.5	3194	3006	3429	2959	3095	27	141	0.11	-0.15	82	233	3194	3006	6012	2959	3411	2959	5730	0.48	0.95	3006	0.17	0.24
S_T6_1069_1.lma	Stuttgart	Penang	Male	140.4	3147	2677	3147	2489	2729	42	197	0	-0.14	126	288	3147	5730	5777	2489	3185	2865	2865	0.16	0.94	3194	0.13	0.23
S_T6_1070_1.lma	Stuttgart	Penang	Male	126.9	3006	2536	3006	2301	2571	21	66	0	-0.26	112	244	3006	2536	3006	2301	2571	2771	2536	0.24	0.87	141	0.09	0.14
S_T6_1071_1.lma	Stuttgart	Penang	Male	110.7	3194	2489	3194	2489	2671	35	197	0	-0.28	106	293	3194	2489	8548	2489	2886	2536	3147	0.45	0.15	5636	0.12	0.18
S_T6_1075_1.lma	Stuttgart	Penang	Male	148.5	3288	3053	3382	2959	3252	37	141	0.06	-0.13	73	203	3288	3053	6716	2959	3926	3147	3053	0.59	0.96	3429	0.15	0.27
S_T6_1078_1.lma	Stuttgart	Penang	Male	145.8	3194	2160	3194	2160	2450	17	75	0	-0.38	108	284	3194	2160	3194	2160	2450	2207	2865	0.68	0.11	188	0.1	0.19
S_T6_1079_1.lma	Stuttgart	Penang	Male	167.4	3147	2818	3429	2442	2776	45	258	0.1	-0.31	156	488	3147	5260	5495	2442	2951	2489	5260	0.59	1	3006	0.09	0.18
S_T6_1081_1.lma	Stuttgart	Penang	Male	97.2	3241	2724	3241	2583	2821	36	94	0	-0.31	121	245	6341	2724	6341	2583	2993	2771	6341	0.37	0	3147	0.16	0.25
S_T6_1083_1.lma	Stuttgart	Penang	Male	108	3147	2348	3147	2348	2611	18	94	0	-0.5	109	216	3147	2348	5636	2348	2681	2395	2348	0.56	0.97	2912	0.11	0.17
S_T6_1084_1.lma	Stuttgart	Penang	Male	162	3335	2912	3335	2865	3017	28	178	0	-0.11	72	170	3335	2912	3335	2865	3017	2959	3335	0.32	0	235	0.25	0.39
S_T6_1086_1.lma	Stuttgart	Penang	Male	113.4	3147	2536	3335	2489	2815	32	132	0.02	-0.46	140	259	3147	2536	3335	2489	2815	2536	3147	0.61	0	329	0.13	0.19
S_T6_1090_1.lma	Stuttgart	Penang	Male	108	3335	2536	3335	2536	2792	22	94	0	-0.48	116	222	3335	2536	3335	2536	2792	2536	2677	0.72	0.85	188	0.12	0.19
S_T6_1099_1.lma	Stuttgart	Penang	Male	118.8	3288	2301	3288	2301	2579	29	219	0	-0.37	179	407	3288	2301	3288	2301	2579	2489	2630	0.4	0.91	329	0.1	0.16
S_T6_1100_1.lma	Stuttgart	Penang	Male	143.1	3194	2677	3194	2489	2798	45	178	0	-0.22	105	354	3194	2677	3194	2489	2798	2630	2959	0.54	0.87	282	0.15	0.26
S_T6_1101_1.lma	Stuttgart	Penang	Male	105.3	3194	2583	3194	2348	2623	25	141	0	-0.38	155	303	3194	2583	3194	2348	2623	2395	2583	0.55	1	329	0.1	0.2
S_T6_1152_1.lma	Stuttgart	Penang	Male	110.7	2865	2536	2865	2489	2616	14	75	0	-0.2	66	179	2865	2536	4978	2489	2737	2583	2536	0.43	1	2489	0.09	0.15
S_T6_1154_1.lma	Stuttgart	Penang	Male	159.3	3382	2865	3382	2677	2960	24	150	0	-0.2	123	264	3382	2865	5777	2677	3577	2818	2865	0.5	0.95	2912	0.09	0.17
S_T6_1167_1.lma	Stuttgart	Penang	Male	137.7	3241	2724	3288	2630	2897	20	103	0.02	-0.18	147	250	3241	2724	3288	2630	2897	2865	2724	0.28	1	282	0.1	0.17
S_T6_1171_1.lma	Stuttgart	Penang	Male	132.3	3194	2630	3194	2630	2858	24	94	0	-0.13	111	213	3194	2630	3194	2630	2858	2677	2912	0.44	0.92	235	0.09	0.15
S_T6_1185_1.lma	Stuttgart	Penang	Male	110.7	2677	2489	2677	2442	2493	18	82	0	-0.06	38	132	2677	2489	4932	2442	2911	2442	2489	0.38	1	2442	0.09	0.15
S_T6_1190_1.lma	Stuttgart	Penang	Male	89.1	2865	2630	3194	2630	3057	70	344	0.41	0.01	121	432	2865	5448	5683	2865	3390	3147	2865	0.34	0	2536	0.3	0.44
S_T6_1191_1.lma	Stuttgart	Penang	Male	148.5	3147	2630	3147	2489	2834	23	94	0	-0.25	51	199	3147	2630	9252	2489	3059	2865	2677	0.43	0.96	6153	0.19	0.34
S_T6_1240_1.lma	Stuttgart	Penang	Male	137.7	3147	2301	3241	2254	2649	33	122	0.12	-0.5	131	308	3147	2301	6481	2254	2712	2254	6481	0.74	0.16	3335	0.1	0.17
S_T6_1244_1.lma	Stuttgart	Penang	Male	156.6	1503	2959	3335	1503	3115	52	1096	0.14	-0.09	123	1734	1503	2959	5871	1503	3214	3006	1503	0.63	0	2865	0.15	0.31
S_T6_1259_1.lma	Stuttgart	Penang	Male	140.4	3194	2771	3288	2489	2882	33	235	0.12	-0.26	93	220	3194	2771	6528	2489	2944	2771	2818	0.43	0.94	3288	0.14	0.26
S_T6_1262_1.lma	Stuttgart	Penang	Male	132.3	3241	2912	3382	2630	3023	35	164	0.17	-0.27	92	226	3241	2912	6669	2630	3660	2959	2959	0.58	0.98	3335	0.11	0.19
S_T6_1271_1.lma	Stuttgart	Penang	Male	113.4	3288	3053	3288	3006	3156	33	169	0	-0.15	65	256	6575	3053	8454	3006	4274	3288	3288	0.22	0.93	5448	0.18	0.3
S_T6_1278_1.lma	Stuttgart	Penang	Male	132.3	3288	2489	3335	2207	2668	43	197	0.02	-0.38	207	348	3288	2489	3335	2207	2668	3053	2489	0.17	1	376	0.1	0.17
S_T6_1073_1.lma	Stuttgart	Penang	Male	108	3194	1644	3288	1644	3065	94	1018	0.1	-0.21	124	1227	3194	1644	5824	1644	3407	3147	3194	0.31	0.97	2912	0.28	0.45
S_T6_1074_1.lma	Stuttgart	Penang	Male	94.5	3006	2254	3100	2254	2845	66	282	0.03	-0.49	150	407	3006	798	8783	470	3659	2912	845	0.59	0.91	6341	0.34	0.52
S_T6_1193_1.lma	Stuttgart	Penang	Male	143.1	3006	2348	3053	2348	2621	26	169	0.02	-0.21	148	322	3006	2348	3053	2348	2621	2489	2630	0.46	0.87	423	0.11	0.16
S_T6_1199_1.lma	Stuttgart	Penang	Male	118.8	3241	2959	3288	1597	2952	102	908	0.12	-0.35	146	1034	3241	2959	5542	1597	3013	2912	2959	0.42	1	2724	0.22	0.37
S_T6_1204_1.lma	Stuttgart	Penang	Male	113.4	3147	2301	3335	2301	3008	78	391	0.2	-0.39	163	373	6247	2301	6528	2301	4160	6528	2301	0.29	1	3335	0.16	0.28
S_T6_1205_1.lma	Stuttgart	Penang	Male	89.1	3241	2348	3241	2301	2888	77	329	0	-0.51	140	479	3241	2348	5777	2301	3484	3053	5777	0.31	0.97	3429	0.22	0.41
S_T6_1229_1.lma	Stuttgart	Penang	Male	99.9	3241	3335	3335	2865	3187	53	178	0.11	-0.18	100	303	6528	3335	6575	2865	3365	3335	3335	0.31	0.97	3335	0.18	0.34
S_T6_1242_1.lma	Stuttgart	Penang	Male	129.6	3006	2724	3194	2724	3001	32	244	0.15	-0.16	90	343	3006	5824	5871	2724	3663	3147	3194	0.4	0.94	2959	0.11	0.17
S_T6_1249_1.lma	Stuttgart	Penang	Male	108	3053	2912	3241	2865	3014	18	94	0.23	-0.17	68	160	3053	2912	6012	2865	3230	3194	3194	0.33	0.08	3006	0.17	0.34
S_T6_1264_1.lma	Stuttgart	Penang	Male	113.4	3100	3288	3288	2348	3018	65	626	0.29	-0.37	157	630	3100	3288	6575	2348	3331	3241	3100	0.44	0	3335	0.24	0.37
S_T6_1281_1.lma	Stuttgart	Penang	Male	81	2912	2912	2959	2254	2690	75	391	0.21	-0.52	145	578	2912	2912	6153	2254	2798	2865	2912	0.48	1	3241	0.33	0.46
S_T6_1293_1.lma	Stuttgart	Penang	Male	62.1	3147	2301	3147	2301	2736	40	160	0	-0.98	86	221	3147	2301	6059	2301	4058	2348	3147	0.77	0	3241	0.37	0.5
S_T6_1301_1.lma	Stuttgart	Penang	Male	81	3194	3382	4791	2348	3059	196	1118	0.86	0.31	329	1576	3194	1080	8783	798	4180	3053	5166	0.21	0.72	4509	0.33	0.49
S_T6_1202_1.lma	Stuttgart	Penang	Male	89.1	3147	2630	4133	2301	2882	121	1353	0.78	-0.52	166	1471	3147	2630	5824	2301	3572	5730	2630	0.44	1	3100	0.27	0.42
S_T6_1207_1.lma	Stuttgart	Penang	Male	94.5	3053	2207	3241	2207	2917	126	620	0.18	-0.49	207	646	3053	2207	3241	2207	2917	3241	2207	0.38	1	1033	0.15	0.25
S_T6_1266_1.lma	Stuttgart	Penang	Male	126.9	3100	3100	3288	2254	2930	78	438	0.11	-0.32	145	514	3100	1315	8548	1174	3688	3006	2301	0.33	0.89	5542	0.28	0.42
S_T6_1274_1.lma	Stuttgart	Penang	Male	108	3194	2348	3194	2348	2856	57	348	0	-0.4	66	382	3194	2348	3194	2348	2856	2912	2912	0.46	0.95	564	0.23	0.36
S_T6_1277_1.lma	Stuttgart	Penang	Male	94.5	3194	2959	3288	2348	3057	84	357	0.15	-0.17	176	661	6528	2959	6528	2677	4058	6528	2959	0.21	0.97	3241	0.25	0.42
S_T6_1089_1.lma	Stuttgart	Penang	Male	108	3241	1597	3288	1550	2802	65	460	0.03	-0.69	130	687	3241	1080	7421	1080	3584	3241	1550	0.15	0.95	5025	0.19	0.34
S_T6_1096_1.lma	Stuttgart	Penang	Male	143.1	2395	1456	3241	1456	2813	136	1165	0.31	-0.35	324	933	2395	1127	8548	517	3638	3100	1127	0.42	1	5777	0.29	0.42
S_T6_1182_1.lma	Stuttgart	Penang	Male	126.9	2912	3053	3147	2912	3038	23	132	0.17	-0.03	68	162	2912	5824	5871	2912	3669	3100	5824	0.35	1	2818	0.11	0.19
S_T6_1183_1.lma	Stuttgart	Penang	Male	151.2	2395	2207	3194	1550	2742	66	667	0.07	-0.3	121	844	1174	1080	5589	939	2721	2912	1174	0.49	0	2771	0.23	0.36
S_T6_1211_1.lma	Stuttgart	Penang	Male	137.7	2912	2301	3241	2301	2783	25	132	0.14	-0.37	135	309	2912	2301	6341	2301	3860	5730	2301	0.46	1	3476	0.27	0.45
S_T6_1225_1.lma	Stuttgart	Penang	Male	116.1	3100	2912	3100	2912	2959	9	47	0	-0.09	41	83	3100	2912	5871	2912	3563	2959	2912	0.26	1	2959	0.14	0.21
S_T6_1238_1.lma	Stuttgart	Penang	Male	113.4	3147	3006	3288	2818	3064	20	132	0.2	-0.17	61	157	6528	3006	6575	2959	3808	3053	3006	0.39	1	3335	0.15	0.21
S_T6_1254_1.lma	Stuttgart	Penang	Male	137.7	3194	3053	3476	2912	3146	48	225	0.04	-0.19	69	284	3194	3053	5777	2912	3302	3335	3006	0.22	0.94	2865	0.15	0.29
S_T6_1265_1.lma	Stuttgart	Penang	Male	118.8	3194	2912	3241	2771	3076	47	197	0.05	-0.12	92	257	3194	2912	5589	2771	3192	3194	3053	0.3	0.95	2536	0.19	0.33
S_T6_1275_1.lma	Stuttgart	Penang	Male	148.5	3241	2489	3335	2489	2987	31	204	0.15	-0.29	102	223	3241	2489	5636	2489	3322	3335	2489	0.24	1	2818	0.13	0.2
S_T6_1283_1.lma	Stuttgart	Penang	Male	102.6	2912	3241	3241	2865	3104	30	153	0.32	-0.07	95	254	2912	6200	6481	2865	4187	6481	6200	0.41	1	3335	0.18	0.29
S_T6_1292_1.lma	Stuttgart	Penang	Male	113.4	3053	3100	3147	2348	3046	61	451	0.39	-0.05	88	670	3053	3100	6200	2348	3621	3100	3100	0.34	1	3241	0.26	0.45
D_T5_1777_11.lma	Dortmund	Solo	Female	359.1	3663	2395	4227	1456	3096	157	1249	0.83	-0.17	442	1514	376	1409	7327	376	3738	2395	376	0.64	0	4462	0.72	0.88
D_T5_1777_15.lma	Dortmund	Solo	Female	359.1	3898	3663	4133	1456	3176	87	921	0.68	-0.11	488	1548	3898	5025	7468	1315	4130	3194	5025	0.38	1	3992	0.57	0.87
D_T5_1777_16.lma	Dortmund	Solo	Female	399.6	2160	1597	4133	1456	3262	125	1494	0.58	-0.04	541	1742	658	705	7609	470	3599	3663	751	0.1	0.99	5072	0.64	0.87
D_T5_1777_19.lma	Dortmund	Solo	Female	361.8	3898	2301	4650	1691	3440	177	1888	0.61	0.02	606	1776	845	470	7468	470	3879	3241	845	0.35	0	4650	0.66	0.87
D_T5_1778_4.lma	Dortmund	Solo	Female	226.8	2677	4509	4603	2442	3206	160	1252	0.76	-0.14	406	1578	1080	705	7233	658	3563	3476	751	0.42	0.01	3616	0.67	0.88
D_T5_1779_2.lma	Dortmund	Solo	Female	234.9	3851	1597	4650	1597	3235	249	1910	0.64	-0.29	385	1859	3851	1315	7656	1315	4662	7421	1315	0.29	1	3757	0.61	0.87
D_T5_1779_3.lma	Dortmund	Solo	Female	294.3	3804	4462	4603	2301	3211	86	1174	0.96	-0.17	426	1787	3804	4462	7374	1362	4167	2301	3804	0.69	0	3757	0.58	0.87
D_T5_1781_12.lma	Dortmund	Solo	Female	434.7	3757	3616	4274	2442	3226	97	1334	0.59	-0.05	410	1086	3757	517	7280	517	3407	2536	3851	0.53	0.96	3663	0.61	0.88
D_T5_1781_13.lma	Dortmund	Solo	Female	291.6	3710	3288	4509	2207	3066	105	1071	0.95	-0.15	422	1787	3710	1127	5307	1127	3130	2583	1127	0.51	1	2677	0.64	0.88
D_T5_1781_16.lma	Dortmund	Solo	Female	361.8	3757	3006	3757	1550	3075	61	733	0	-0.27	213	1206	7468	986	7468	939	3732	3663	1315	0.33	0.92	3851	0.48	0.75
D_T5_1781_24.lma	Dortmund	Solo	Female	380.7	3851	1550	3851	1550	3032	104	1550	0	-0.22	392	1302	3851	423	7609	376	4185	6857	4650	0.3	0.82	4556	0.62	0.85
D_T5_1781_26.lma	Dortmund	Solo	Female	342.9	2677	2724	4791	1738	3496	208	1620	0.87	-0.02	570	1742	517	1174	7750	517	4616	6904	705	0.39	0.01	3898	0.66	0.88
D_T5_1781_27.lma	Dortmund	Solo	Female	359.1	3710	4509	4509	2348	3417	70	573	0.91	-0.1	486	1404	3710	4509	11695	1409	5498	7045	4509	0.43	1	3992	0.59	0.89
D_T5_1781_28.lma	Dortmund	Solo	Female	348.3	3851	3241	4133	1409	3265	123	1522	0.91	-0.15	464	1638	3851	1127	7562	517	4170	3335	4603	0.41	0.96	4039	0.69	0.88
D_T5_1781_35.lma	Dortmund	Solo	Female	418.5	3710	1550	4509	1550	2984	140	1691	0.9	-0.14	549	1939	3710	1268	7280	564	3392	2301	1315	0.57	0.99	4227	0.63	0.89
D_T5_1781_40.lma	Dortmund	Solo	Female	448.2	3663	1832	4509	1550	3068	140	1606	0.85	-0.13	576	1927	7374	470	7421	470	3850	2912	4556	0.41	0.98	3851	0.6	0.88
D_T5_1781_53.lma	Dortmund	Solo	Female	334.8	2207	1550	3992	1550	2985	154	1400	0.88	-0.27	302	2185	658	658	7468	423	3761	5542	658	0.55	0.01	3710	0.63	0.87
D_T5_1781_56.lma	Dortmund	Solo	Female	348.3	1550	2724	4509	1550	3134	177	1190	0.81	-0.15	489	2026	705	658	7515	470	4609	3335	705	0.41	0	4086	0.65	0.89
D_T5_1781_9.lma	Dortmund	Solo	Female	353.7	1550	3429	4509	1550	3253	200	1691	0.72	-0.09	418	1984	15875	470	15875	376	3205	3288	15875	0.4	0	15499	0.66	0.9
D_T5_1790_3.lma	Dortmund	Solo	Female	267.3	1503	1597	3851	1409	2793	142	1691	0.86	-0.47	255	2391	705	986	10896	376	3834	2489	705	0.64	0	3945	0.65	0.86
D_T5_1802_5.lma	Dortmund	Solo	Female	410.4	3945	2395	4133	1409	3103	102	1090	0.78	-0.2	441	1490	3945	18270	18270	376	4246	3288	18270	0.36	1	13432	0.66	0.86
D_T5_1803_16.lma	Dortmund	Solo	Female	429.3	3476	1503	3898	1409	2910	137	1653	0.87	-0.23	300	2181	564	1503	10239	564	4088	2442	10239	0.65	0.01	9675	0.62	0.85
